# Supplementary material for: Rapid Evolutionary Dynamics of Structural Disorder as a Potential Driving Force for Biological Divergence in Flaviviruses
Source: PubMed Central journal article supplement — Genome Biol Evol. 2013 Feb 15;5(3):504–13. doi: 10.1093/gbe/evt026 (PMC3622304; doi:10.1093/gbe/evt026), 2013-02-15

# Supplementary material

|          | Title                               |
|----------|-------------------------------------|
| Table 1  | Sequence data & evolutionary models |
| Figure 1 | Phylogeny                           |
| A        | Capsid                              |
| B        | Mp                                  |
| C        | Envelope                            |
| D        | NS1                                 |
| E        | NS2a                                |
| F        | NS2b                                |
| G        | NS3                                 |
| H        | NS4a                                |
| I        | NS4b                                |
| J        | NS5                                 |
| Figure 2 | IUPred & GLOOME                     |
| A        | Capsid analysis                     |
| B        | Mp analysis                         |
| C        | Envelope analysis                   |
| D        | NS1 analysis                        |
| E        | NS2a analysis                       |
| F        | NS2b analysis                       |

|          | Title                           |
|----------|---------------------------------|
| G        | NS3 analysis                    |
| H        | NS4a analysis                   |
| I        | NS4b analysis                   |
| J        | NS5 analysis                    |
| Figure 3 | IUPred vs PONDR-FIT             |
| A        | Capsid analysis                 |
| B        | Mp analysis                     |
| C        | Envelope analysis               |
| D        | NS1 analysis                    |
| E        | NS2a analysis                   |
| F        | NS2b analysis                   |
| G        | NS3 analysis                    |
| H        | NS4a analysis                   |
| I        | NS4b analysis                   |
| J        | NS5 analysis                    |
| Figure 4 |                                 |
|          | IUPred vs PONDR-FIT             |
| Figure 5 |                                 |
|          | TBEV vs. DENV1 Envelope protein |

# Abbreviations

capsid protein, C; membrane glycoprotein precursor, Mp; envelope protein, E; nonstructural protein, NS; 2K protein, 2K; Tamana bat virus, TABV; Quang Binh virus, QBV; Cell Fusing Agent virus CFAV; Culex flavivirus, CxFV; Aedes flavivirus, AeFV; Kamiti River virus, KRV; Louping ill virus, LIV; Tick-borne encephalitis virus, TBEV; Omsk hemorrhagic fever virus, OHFV; Langat virus, LGTV; Alkhurma hemorrhagic fever virus, AHFV; Karshi virus, KARV; Powasson virus, POWV; Montana myotis leukoencephalitis virus, MMLV; Modoc virus, MODV; Apoi virus, APOIV; Rio Bravo virus, RBV; Sepik virus, SEPV; Wesselbron virus, WESSV; Yellow fever virus, YFV; Yokose virus, YOKV; Entebbe bat virus, ENTV; Dengue virus serotypes 1-4, DENV-1-4; Kedougou virus, KEDV; Zika virus, ZIKV; Kokobera virus, KOKV; Aroa virus, AROAV; Bagaza virus, BAGV; Ilheus virus, ILHV; St. Louis Encephalitis virus, SLEV; West Nile virus p, WNVp; West Nile virus, WNV; Murray Valley Encephalitis virus, MVEV; Usutu virus, USUV; Japanese Encephalitis virus, JEV; multiple sequence alignment, MSA; disorder to order transition, DOT

**Table 1. Sequence data**

| <b>C</b> |                     | <b>Mp</b> |                       | <b>E</b> |                       | <b>NS1</b> |                        |
|----------|---------------------|-----------|-----------------------|----------|-----------------------|------------|------------------------|
| DENV-1   | NP_722457           | DENV-1    | NP_733807             | DENV-1   | NP_722460             | DENV-1     | NP_722461              |
| DENV-3   | YP_001531164        | DENV-3    | YP_001531166          | DENV-3   | YP_001621843, 281-773 | DENV-3     | YP_001531169           |
| DENV-2   | NP_739591           | DENV-2    | NP_739582             | DENV-2   | NP_056776, 281-775    | DENV-2     | NP_739584              |
| DENV-4   | NP_740313           | DENV-4    | NP_740315             | DENV-4   | ADA00410, 280-774     | DENV-4     | NP_740318              |
| ZIKV     | YP_002790881, 1-99  | ZIKV      | AEN75266, 124-290     | ZIKV     | YP_002790881, 291-790 | ZIKV       | YP_002790881, 791-1142 |
| KOKV     | YP_001040007, 3-99  | KEDV      | YP_002790882, 122-282 | KEDV     | YP_002790882, 283-782 | AROAV      | YP_001040004, 794-1142 |
| KEDV     | YP_002790882, 1-97  | KOKV      | YP_001040007, 121-286 | JEV      | NP_059434, 295-794    | SLEV       | AAA47786, 790-1141     |
| AROAV    | YP_001040004, 3-100 | BAGV      | YP_002790883, 130-289 | WNVp     | NP_041724, 291-787    | KOKV       | YP_001040007, 788-1138 |
| SLEV     | ABN11815, 3-98      | USUV      | YP_164809             | KOKV     | YP_001040007, 287-787 | USUV       | YP_164811              |
| BAGV     | YP_002790883, 4-101 | WNVp      | NP_776012             | WNV      | ADD23629, 272-772     | WNVp       | NP_776015              |
| USUV     | AEK21245, 1-104     | ILHV      | YP_001040006, 119-285 | ILHV     | YP_001040006, 286-786 | WNV        | YP_001527881           |
| MVEV     | P05769, 1-105       | SLEV      | ADD49664, 122-288     | USUV     | AFE85504, 294-793     | MVEV       | NP_722532              |
| ILHV     | YP_001040006, 7-97  | ENTV      | YP_950477, 135-287    | MVEV     | NP_051124, 293-793    | JEV        | NP_775667              |
| WNVp     | YP_001527878        | MVEV      | NP_733817             | AROAV    | YP_001040004, 293-793 | KEDV       | YP_002790882, 784-1135 |
| JEV      | NP_775662           | JEV       | NP_775664             | SLEV     | ACJ70662, 16-514      | ILHV       | YP_001040006, 787-1139 |
| WNV      | NP_776010           | WNV       | YP_001527879          | BAGV     | YP_002790883, 292-790 | YOKV       | NP_872627, 787-1139    |
|          |                     | SEPV      | YP_950478, 147-280    | YFV      | AAC35908, 286-778     | SEPV       | YP_950478, 773-1123    |
|          |                     | YFV       | NP_776000             | WESSV    | ABI54474, 283-770     | BAGV       | YP_002790883, 791-1142 |
|          |                     | YOKV      | NP_872627, 162-296    | SEPV     | AAV34159, 283-770     | WESSV      | ABI54474, 773-1123     |
|          |                     | POWV      | NP_775514             | ENTV     | YP_950477, 290-776    | ENTV       | YP_950477, 777-1129    |
|          |                     | RBV       | NP_776070             | YOKV     | NP_872627, 299-786    | YFV        | NP_776002              |
|          |                     | TBEV      | NP_775501             | POWV     | NP_620099, 279-775    | AHFV       | NP_775471              |
|          |                     | LIV       | NP_740274             | AHFV     | AFF18426, 282-777     | POWV       | NP_775517              |
|          |                     | AHFV      | NP_775468             | KARV     | YP_224133, 282-776    | OHFV       | AAR98531, 777-1128     |
|          |                     | LGTV      | NP_740294             | OHFV     | NP_878909, 282-774    | MODV       | NP_740261              |
|          |                     | MMLV      | NP_775644             | LGTV     | NP_620108, 281-779    | LIV        | NP_740723              |
|          |                     | APOIV     | NP_775678             | TBEV     | NP_043135, 281-776    | TBEV       | NP_775504              |
|          |                     | AROAV     | YP_001040004, 126-290 | LIV      | NP_044677, 281-776    | RBV        | NP_776073              |
|          |                     | WESSV     | ABI54474, 147-280     | RBV      | NP_776072             | LGTV       | P_740296               |
|          |                     | OHFV      | AAR98531, 147-280     | MMLV     | NP_689391, 270-753    | KARV       | ABB90671, 777-1129     |
|          |                     | KARV      | YP_224133, 117-280    | APOIV    | NP_620045, 272-756    | MMLV       | NP_775646              |
|          |                     |           |                       | MODV     | NP_619758, 273-754    | APOIV      | NP_775681              |
|          |                     |           |                       | TABV     | NP_658908, 285-786    | CxFV       | YP_006470612, 1-364    |
|          |                     |           |                       | KRV      | NP_937773             | AeFV       | YP_003084126           |
|          |                     |           |                       | AeFV     | YP_003084125          | KRV        | NP_937774              |
|          |                     |           |                       | CFAV     | NP_776040             | CFAV       | NP_776041              |

**Best Models according to Prottest  
(and used for phylogenetic  
reconstruction):**

|             |                  |
|-------------|------------------|
| <b>c</b>    | <b>LG+G+F</b>    |
| <b>e</b>    | <b>LG+G+F</b>    |
| <b>mp</b>   | <b>LG+G</b>      |
| <b>ns1</b>  | <b>LG+G</b>      |
| <b>ns2a</b> | <b>LG+G+F</b>    |
| <b>ns2b</b> | <b>LG+G+F</b>    |
| <b>nS3</b>  | <b>RtREV+G+F</b> |
| <b>ns4a</b> | <b>LG+G+F</b>    |
| <b>ns4b</b> | <b>LG+G+F</b>    |
| <b>ns5</b>  | <b>LG+G+F</b>    |

# Table 1. Sequence data

| <b>NS2A</b> |                         | <b>NS2A</b> |                         | <b>NS3</b> |                         | <b>NS4a</b> |                          | <b>NS4b</b> |                         | <b>NS5</b> |                         |
|-------------|-------------------------|-------------|-------------------------|------------|-------------------------|-------------|--------------------------|-------------|-------------------------|------------|-------------------------|
| DENV-1      | NP_733808               | DENV-1      | NP_733808               | DENV-1     | NP_059433, 1476-2094    | DENV-1      | NP_733811                | DENV-1      | NP_733810               | DENV-1     | NP_722465               |
| DENV-3      | YP_001531170            | DENV-3      | YP_001531170            | DENV-3     | YP_001621843, 1474-2092 | DENV-2      | NP_739589                | DENV-4      | NP_740322               | DENV-3     | NP_001531176            |
| DENV-2      | NP_739585               | DENV-2      | NP_739585               | DENV-2     | ACW82881, 1476-2093     | DENV-3      | YP_00151175              | DENV-2      | NP_739588               | DENV-2     | NP_739590               |
| DENV-4      | NP_740319               | DENV-4      | NP_740319               | DENV-4     | ABO45246, 1475-2092     | DENV-4      | NP_740324                | DENV-3      | YP_001531173            | DENV-4     | NP_740325               |
| AROAV       | YP_001040004, 1146-1309 | AROAV       | YP_001040004, 1146-1309 | ZIKV       | YP_002790881, 1499-2115 | KEDV        | YP_002790882, 2256-2507  | JEV         | NP_775671               | ILHV       | YP_001040006, 2521-3416 |
| WNV         | YP_001527882            | WNV         | YP_001527882            | KEDV       | YP_002790882, 1490-2105 | ZIKV        | YP_0027900881, 2266-2511 | BAGV        | YP002790883, 2131-2245  | SLEV       | YP_001008348, 2531-3421 |
| JEV         | NP_775668               | JEV         | NP_775668               | WNV        | AEE99060, 1506-2124     | KOKV        | YP_001040007, 2258-2500  | SLEV        | NP_059434, 2132-2249    | BAGV       | YP_002790883, 2523-3416 |
| WNVp        | NP_776016               | WNVp        | NP_776016               | WNVp       | AFO64353, 1502-2120     | ILHV        | YP_001040006, 2265-2504  | ILHV        | YP_001008348, 2117-2241 | AROAV      | YP_001040004, 2526-3419 |
| KOKV        | YP_001040007, 1146-1309 | KOKV        | YP_001040007, 1146-1309 | ILHV       | YP_001040006, 1499-2115 | AROAV       | YP_001040004, 2272-2524  | USUV        | YP_164815               | WNV        | YP_0010527887           |
| USUV        | YP_164812               | USUV        | YP_164812               | JEV        | NP_059434, 1505-2123    | WNVp        | NP_776021                | SEPV        | YP_950478, 2103-2228    | MVEV       | NP_722539               |
| MVEV        | NP_722533               | MVEV        | NP_722533               | AROAV      | YP_001040004, 1504-2121 | SLEV        | YP_001008348, 2267-2517  | ZIKV        | YP_002790881, 2125-2242 | KEDV       | YP_002790882, 2513-3408 |
| ILHV        | YP_001040006, 1139-1279 | ILHV        | YP_001040006, 1139-1279 | SLEV       | ABN11820, 1501-2117     | MVEV        | NP_722538                | AROAV       | YP_001040004, 2122-2248 | WNVp       | NP_776022               |
| YFV         | NP_776003               | YFV         | NP_776003               | BAGV       | YP_002790883, 1501-2119 | JEV         | NP_7765673               | KEDV        | YP_002790882, 2111-2232 | USUV       | YP_164818               |
| KEDV        | YP_002790882, 1138-1282 | KEDV        | YP_002790882, 1138-1282 | MVEV       | NP_051124, 1504-2122    | USUV        | YP_164817                | KOKV        | YP_001040007, 2117-2234 | JEV        | NP_775674               |
| SEPV        | YP_950478, 1125-1267    | SEPV        | YP_950478, 1125-1267    | USUV       | YP_164264, 1504-2122    | WNV         | YP_001527886             | YFV         | NP_776006               | ZIKV       | YP_2790881, 2527-3411   |
| POWV        | NP_775518               | POWV        | NP_775518               | KOKV       | YP_001040007, 1493-2108 | YOKV        | NP_872627, 226-2519      | YOKV        | NP_872627, 2121-2242    | KOKV       | YP_001040007, 2509-3405 |
| TBEV        | NP_775505               | TBEV        | NP_775505               | SEPV       | YP_950478, 1480-2102    | SEPV        | YP_950478, 2252-2501     | WNV         | NP_001527885            | YFV        | NP_776009               |
|             |                         |             |                         | WESSV      | YP_002922020, 1480-2102 | BAGV        | YP_002790883, 2269-2517  | WNVp        | NP_77019                | WESSV      | YP_002922020, 2502-3405 |
|             |                         |             |                         | YFV        | AFQ32464, 1485-2107     | ENTV        | YP_950477, 2257-2489     | ENTV        | YP_950477, 2112-2233    | SEPV       | YP_950478, 2502-3402    |
| <b>NS2B</b> |                         | <b>NS2B</b> |                         | YOKV       | NP_872627, 1497-2116    | YFV         | NP_776008                | AHFV        | NP_775475               | KARV       | YP_224133, 2515-3415    |
| DENV-1      | NP_733809               | DENV-1      | NP_733809               | OHFV       | AAR98531, 1511-2110     | WESSV       | YP_002922020, 2252-2490  | LGTV        | NP_003328988            | YOKV       | NP_872627, 2521-3415    |
| DENV-3      | YP_001531171            | DENV-3      | YP_001531171            | ENTV       | YP_950477, 1488-2107    | AHFV        | NP_775477                | POWV        | NP_775521               | LGTV       | NP_740302               |
| DENV-2      | NP_739586               | DENV-2      | NP_739586               | MMLV       | NP_689391, 1464-2079    | OHFV        | NP_878909, 2260-2511     | MMLV        | NP_775650               | POWV       | NP_775524               |
| DENV-4      | NP_740320               | DENV-4      | NP_740320               | TBEV       | ADQ00972, 1490-2110     | LGTV        | NP_740301                | MODV        | NP_740265               | OHFV       | NP_878909, 2513-3400    |
| KEDV        | ABI54477, 1360-1489     | KEDV        | ABI54477, 1360-1489     | APOIV      | NP_620045, 1465-2080    | LIV         | NP_740728                | APOIV       | NP_775685               | AHFV       | NP_775478               |
| KOKV        | YP_001040007, 1363-1492 | KOKV        | YP_001040007, 1363-1492 | LIV        | NP_044677, 1490-2110    | TBEV        | NP_775510                | LIV         | NP_740727               | TBEV       | NP_775511               |
| AROAV       | YP_001040004, 1373-1503 | AROAV       | YP_001040004, 1373-1503 | RBV        | AFG73004, 1464-2080     | KARV        | YP_224133, 2260          | TBEV        | NP_775508               | ENTV       | YP_950477, 2516-3399    |
| ZIKV        | ABI54475, 1367-1496     | ZIKV        | ABI54475, 1367-1496     | LGTV       | ACH42698, 1490-2110     | APOIV       | NP_775687                | OHFV        | NP_878909, 2113-2236    | LIV        | NP_740729               |
| SEPV        | AAV34159, 1350-1479     | SEPV        | AAV34159, 1350-1479     | MODV       | NP_740264               | RBV         | NP_776079                | KARV        | NP_YP_224133            | RBV        | NP_776080               |
| WESSV       | ABI54474, 1350-1479     | WESSV       | ABI54474, 1350-1479     | AHFV       | AFF18426, 1492-2112     | POWV        | NO_775523                | RBV         | NP_776077               | MMLV       | NP_775653               |
| YOKV        | NP_872627, 1372-1496    | YOKV        | NP_872627, 1372-1496    | KARV       | ABB90671, 1509-2110     | MODV        | NP_740266                | WESSV       | YP_002922020, 2252-2490 | APOIV      | NP_775688               |
| WNV         | YP_001527883            | WNV         | YP_001527883            | POWV       | ACD88752, 1490-2110     | MMLV        | NP_775652                | MVEV        | NP_722538               | MODV       | NP_740267               |
| WNVp        | NP_776017               | WNVp        | NP_776017               | KRV        | AAO24117, 1465-2041     |             |                          |             |                         | KRV        | NP_937780               |
| MVEV        | NP_722534               | MVEV        | NP_722534               | CFAV       | AAA48509, 1452-2038     |             |                          |             |                         | CFAV       | NP_776048               |
| BAGV        | YP_002790883, 1371-1500 | BAGV        | YP_002790883, 1371-1500 | CxFV       | YP_006470615, 25-583    |             |                          |             |                         | AeFV       | YP_003084132            |
| YFV         | NP_776004               | YFV         | NP_776004               | QBV        | YP_002884239, 1474-1976 |             |                          |             |                         | CxFV       | YP_899469, 2484-3359    |
| JEV         | NP_775669               | JEV         | NP_775669               | AeFV       | YP_003084129            |             |                          |             |                         | QBV        | YP_002884239, 2480-3356 |
| USUV        | YP_164813               | USUV        | YP_164813               | TABV       | NP_658908               |             |                          |             |                         | TABV       | NP_776035               |
| SLEV        | AAA47786, 1369-1499     | SLEV        | AAA47786, 1369-1499     |            |                         |             |                          |             |                         |            |                         |
| ENTV        | YP_950477, 1363-1471    | ENTV        | YP_950477, 1363-1471    |            |                         |             |                          |             |                         |            |                         |
| ILHV        | YP_001040006, 1368-1497 | ILHV        | YP_001040006, 1368-1497 |            |                         |             |                          |             |                         |            |                         |
| RBV         | NP_776075               | RBV         | NP_776075               |            |                         |             |                          |             |                         |            |                         |
| AHFV        | NP_775473               | AHFV        | NP_775473               |            |                         |             |                          |             |                         |            |                         |
| POWV        | NP_775519               | POWV        | NP_775519               |            |                         |             |                          |             |                         |            |                         |

# Figure 1.

Phylogenies for the different proteins in DENV-1. At the nodes, bootstraps are given indicating node support. 1000 bootstraps were run. The branches are scaled to reflect sequence divergence.

Figure 1A. Capsid

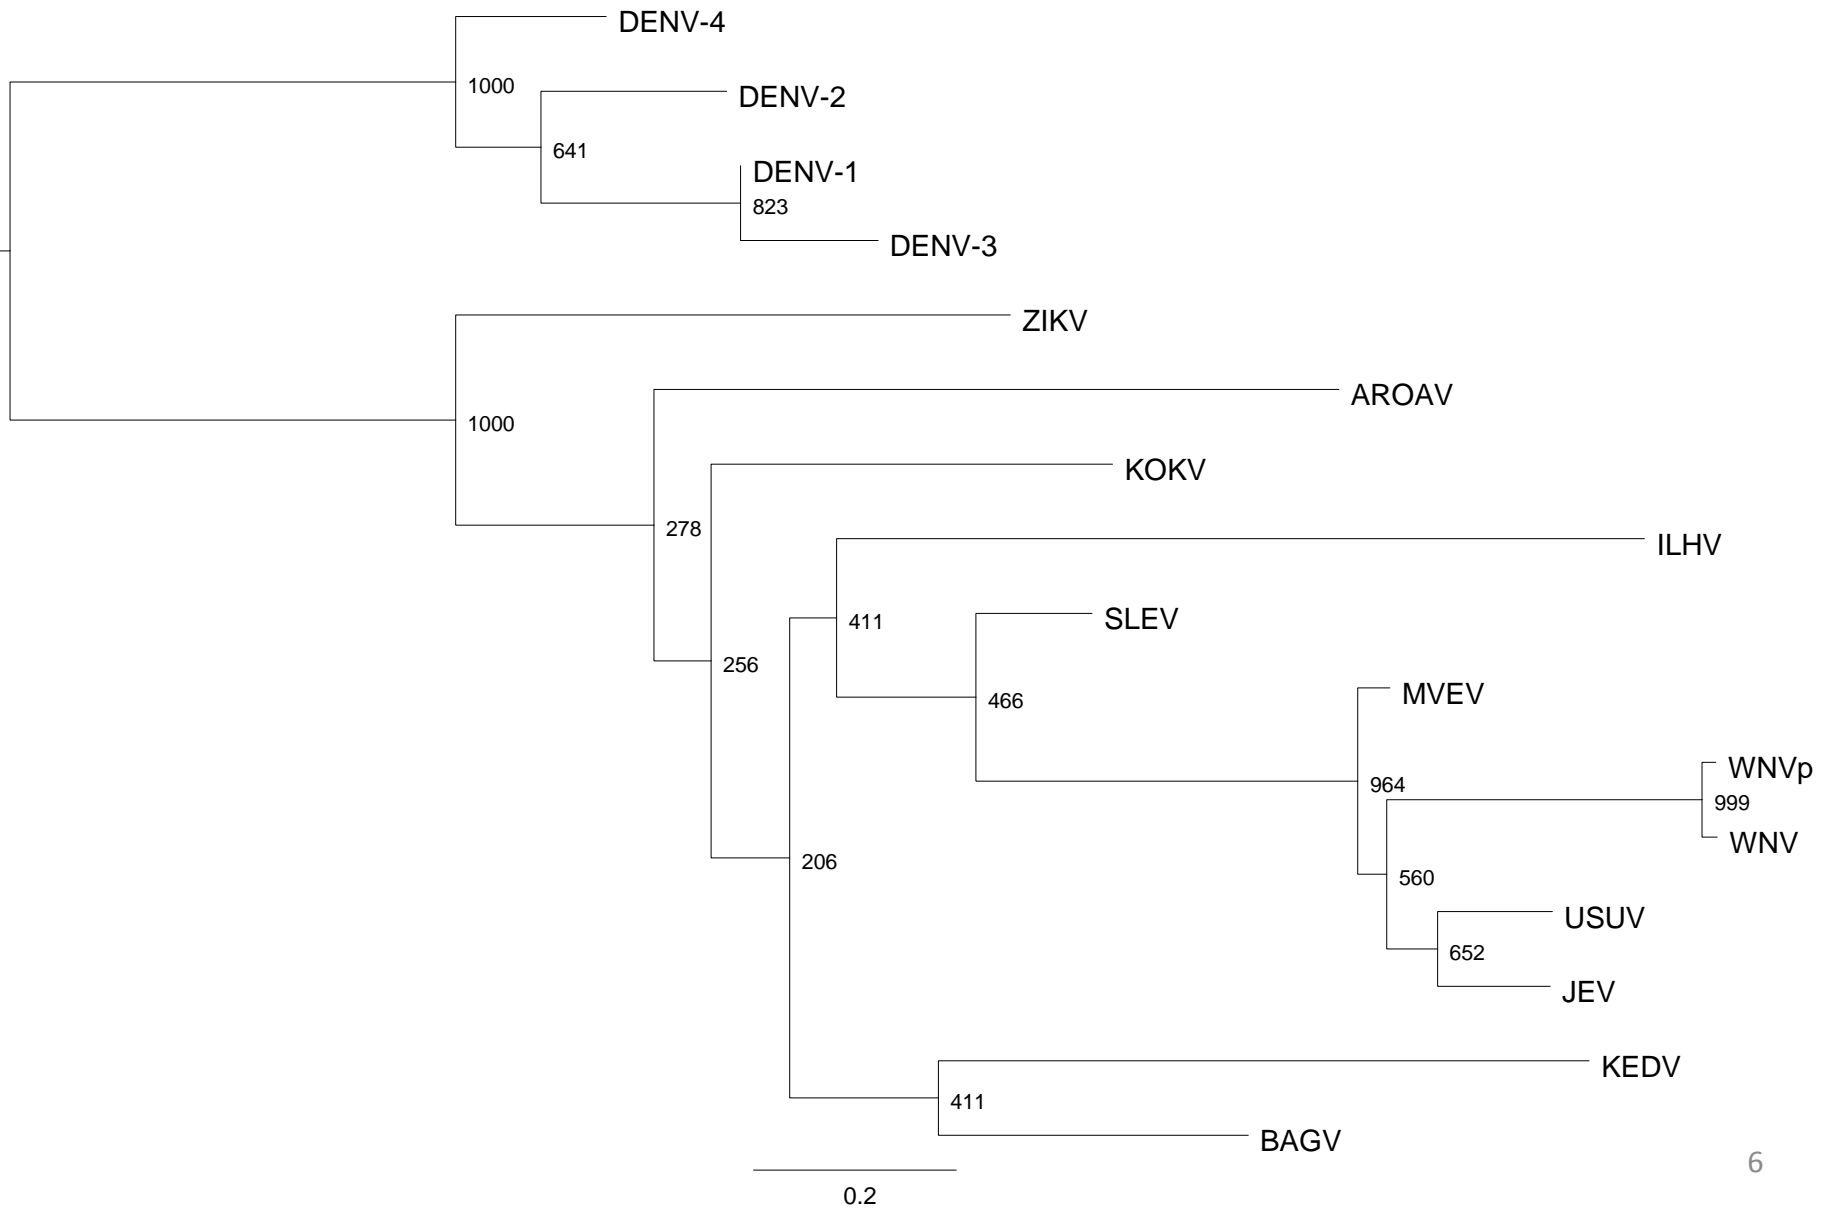

Figure 1B. Mp

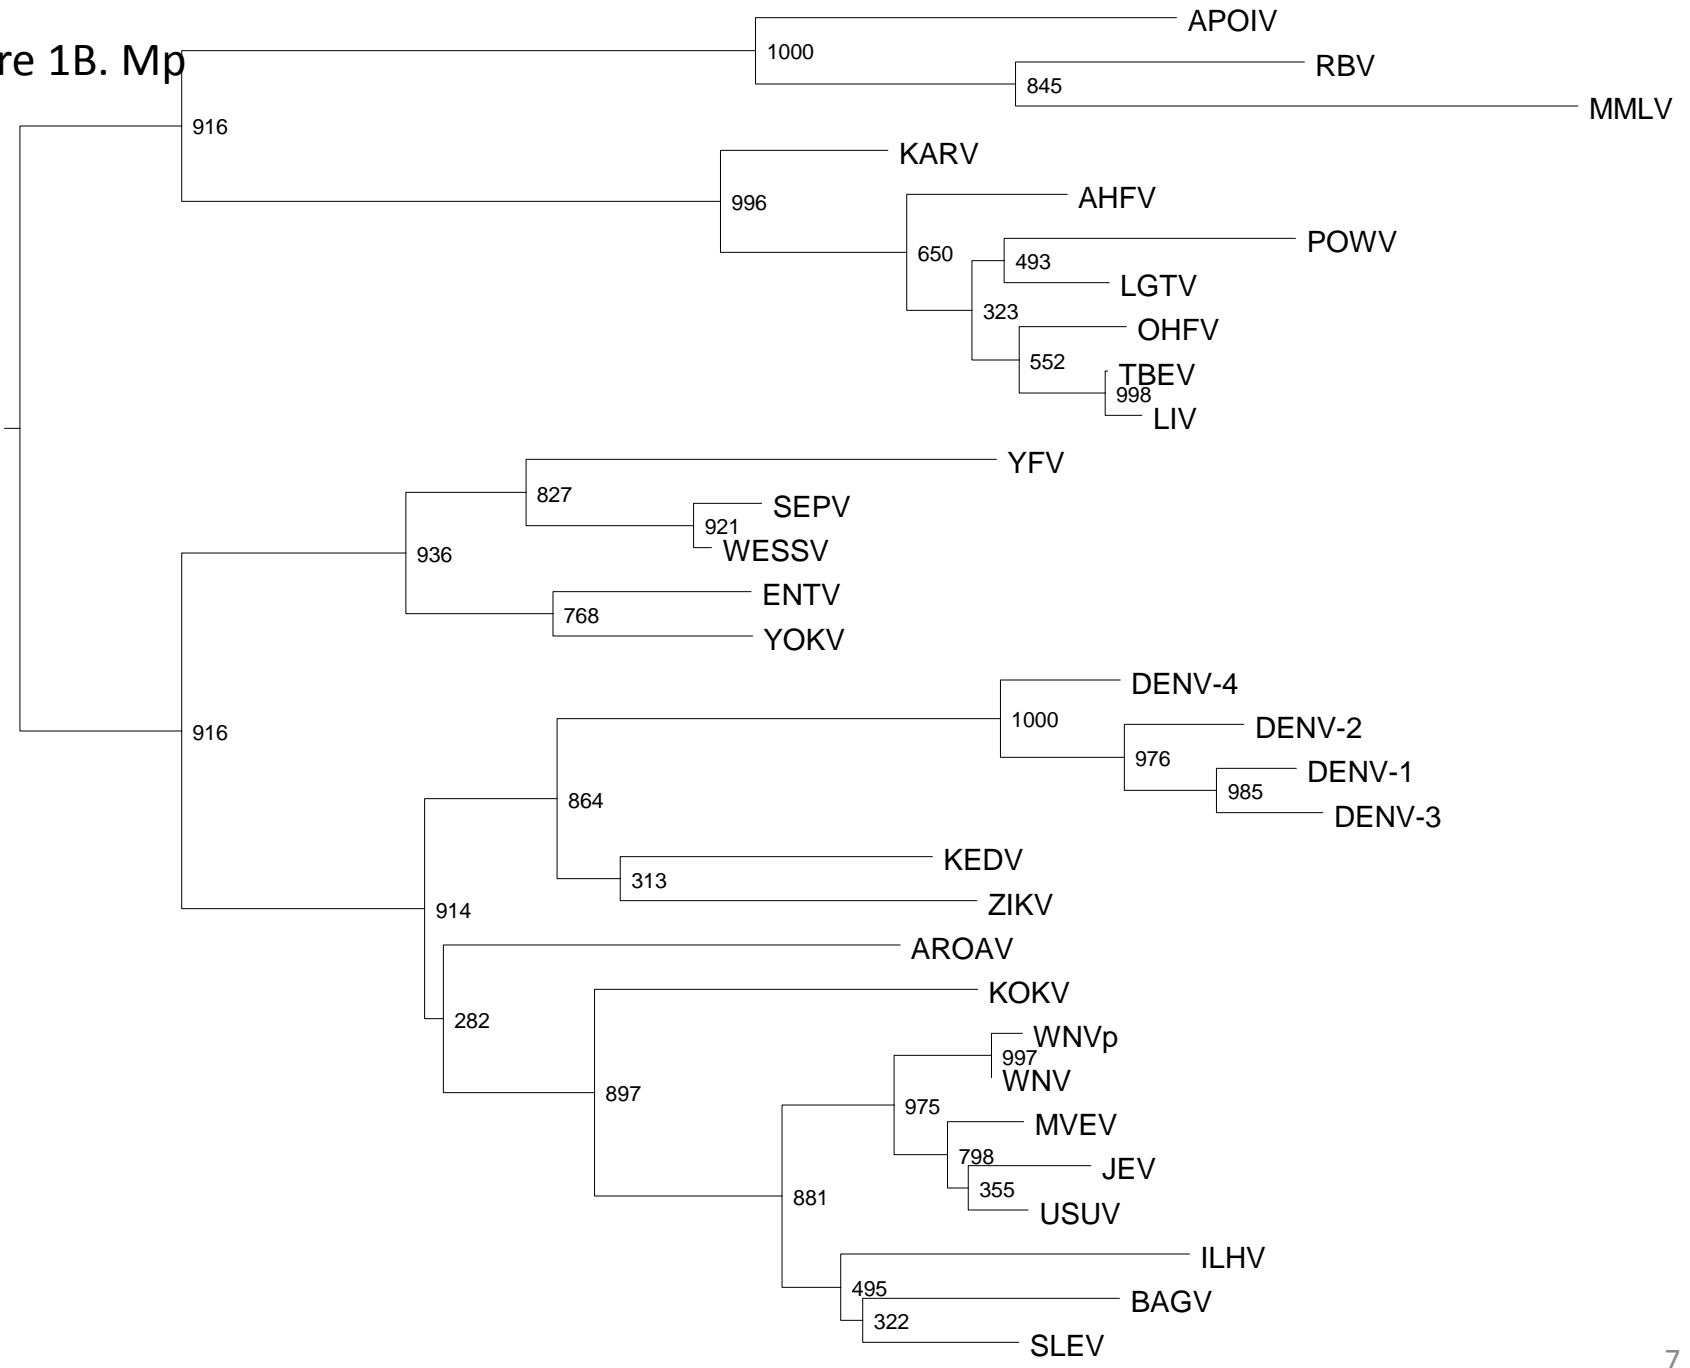

Figure 1C.  
Envelope

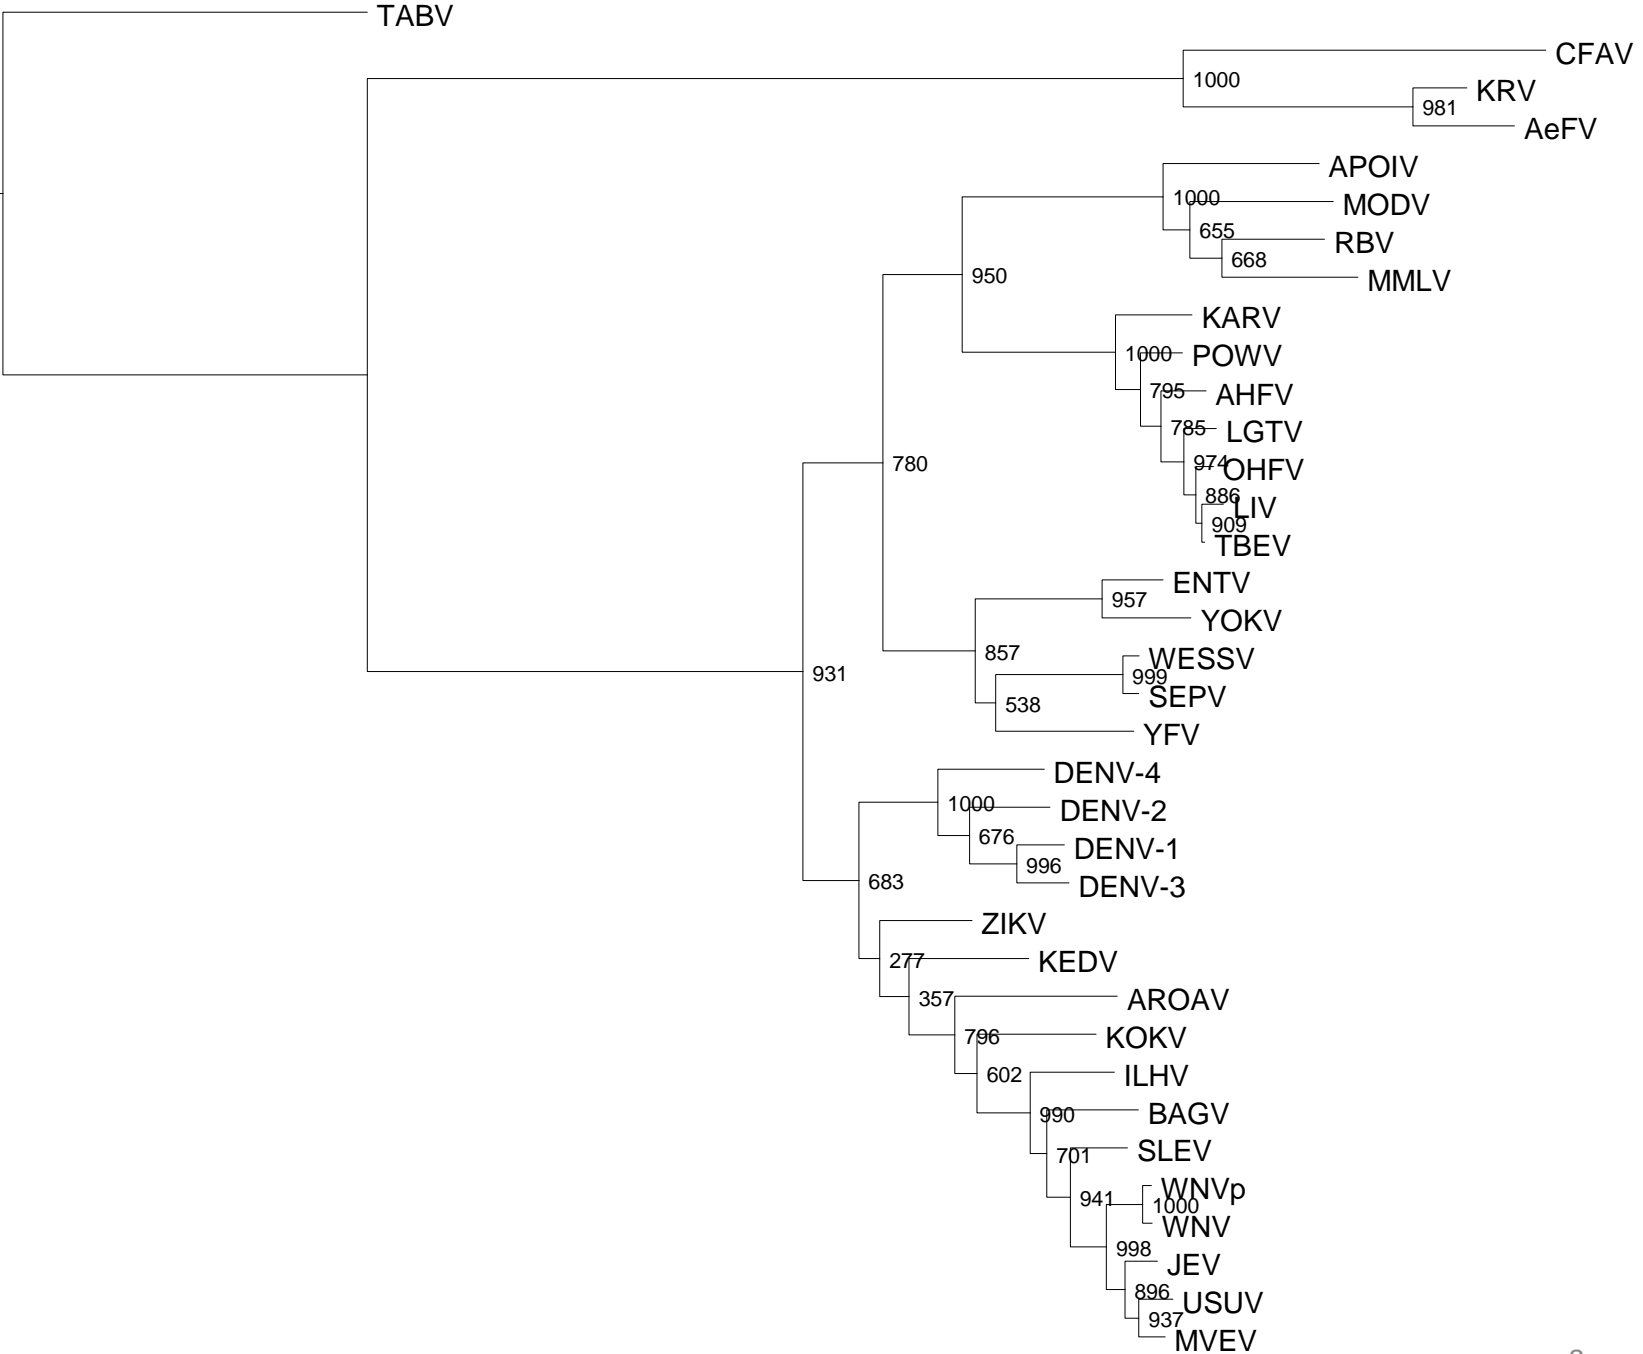



Figure 1D. NS1

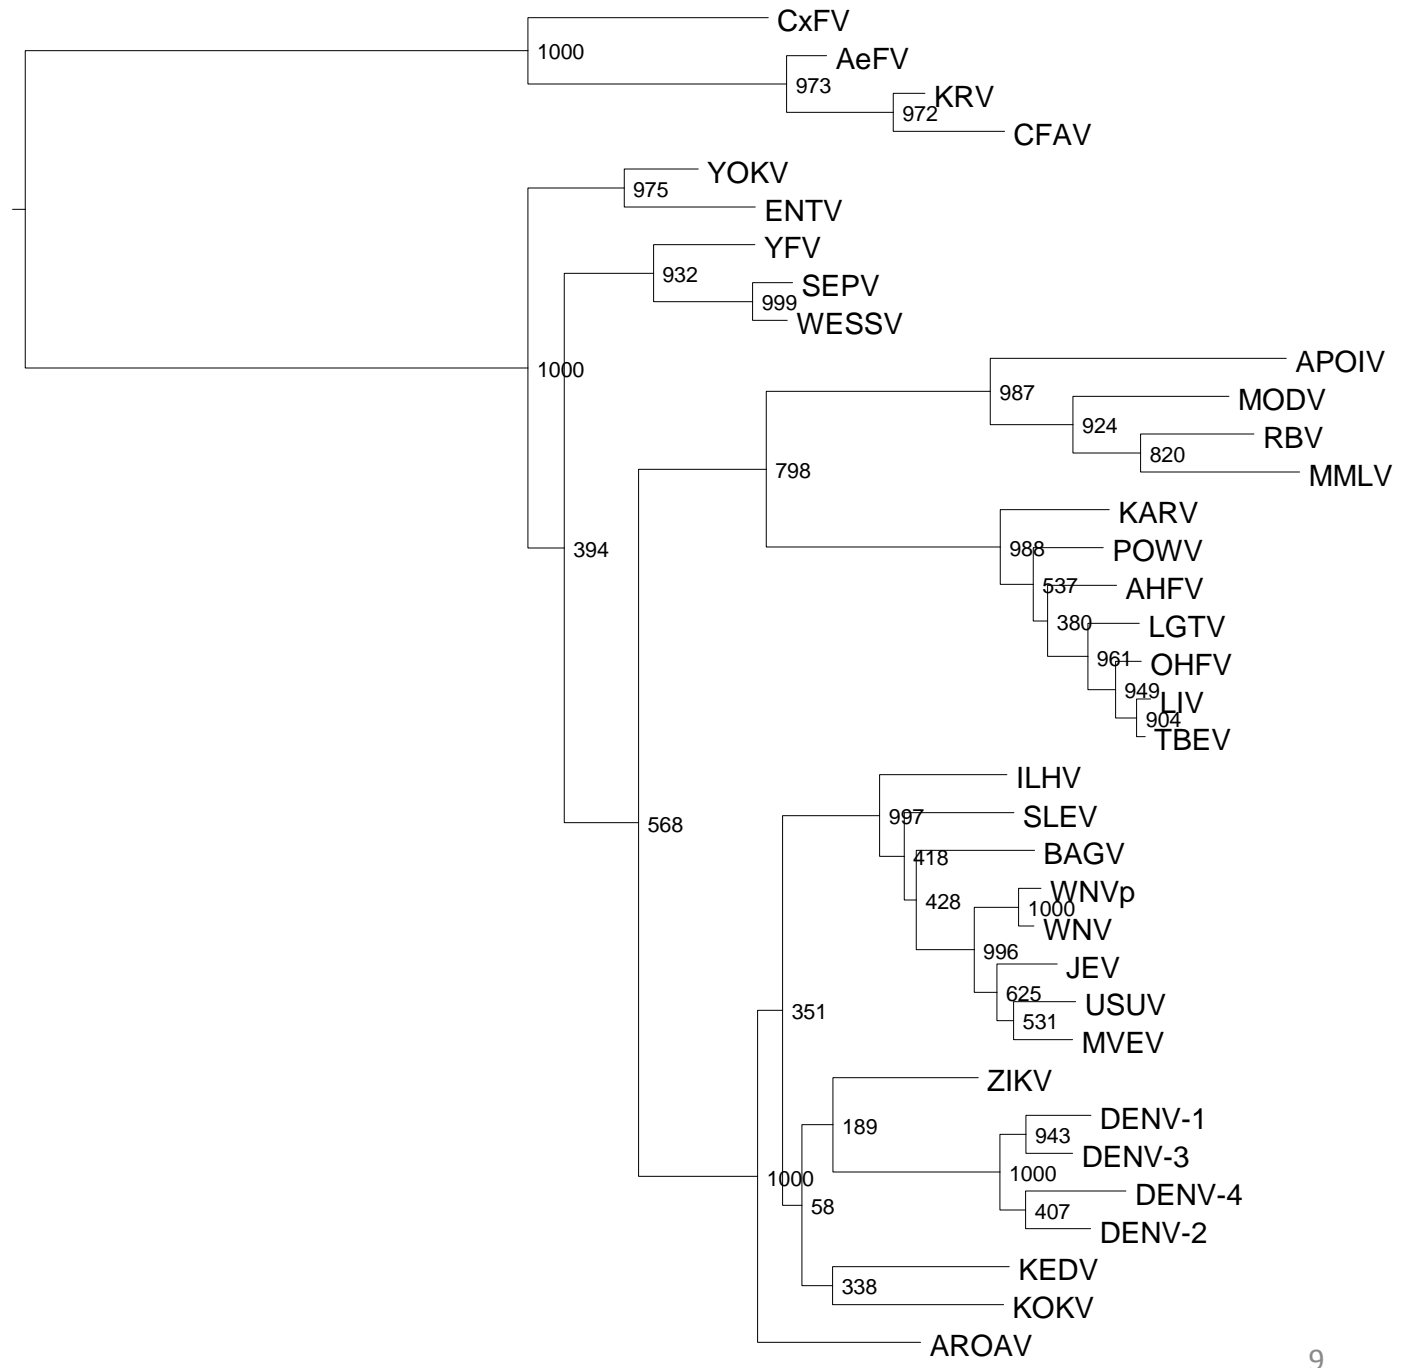

0.6

Figure 1E. NS2a

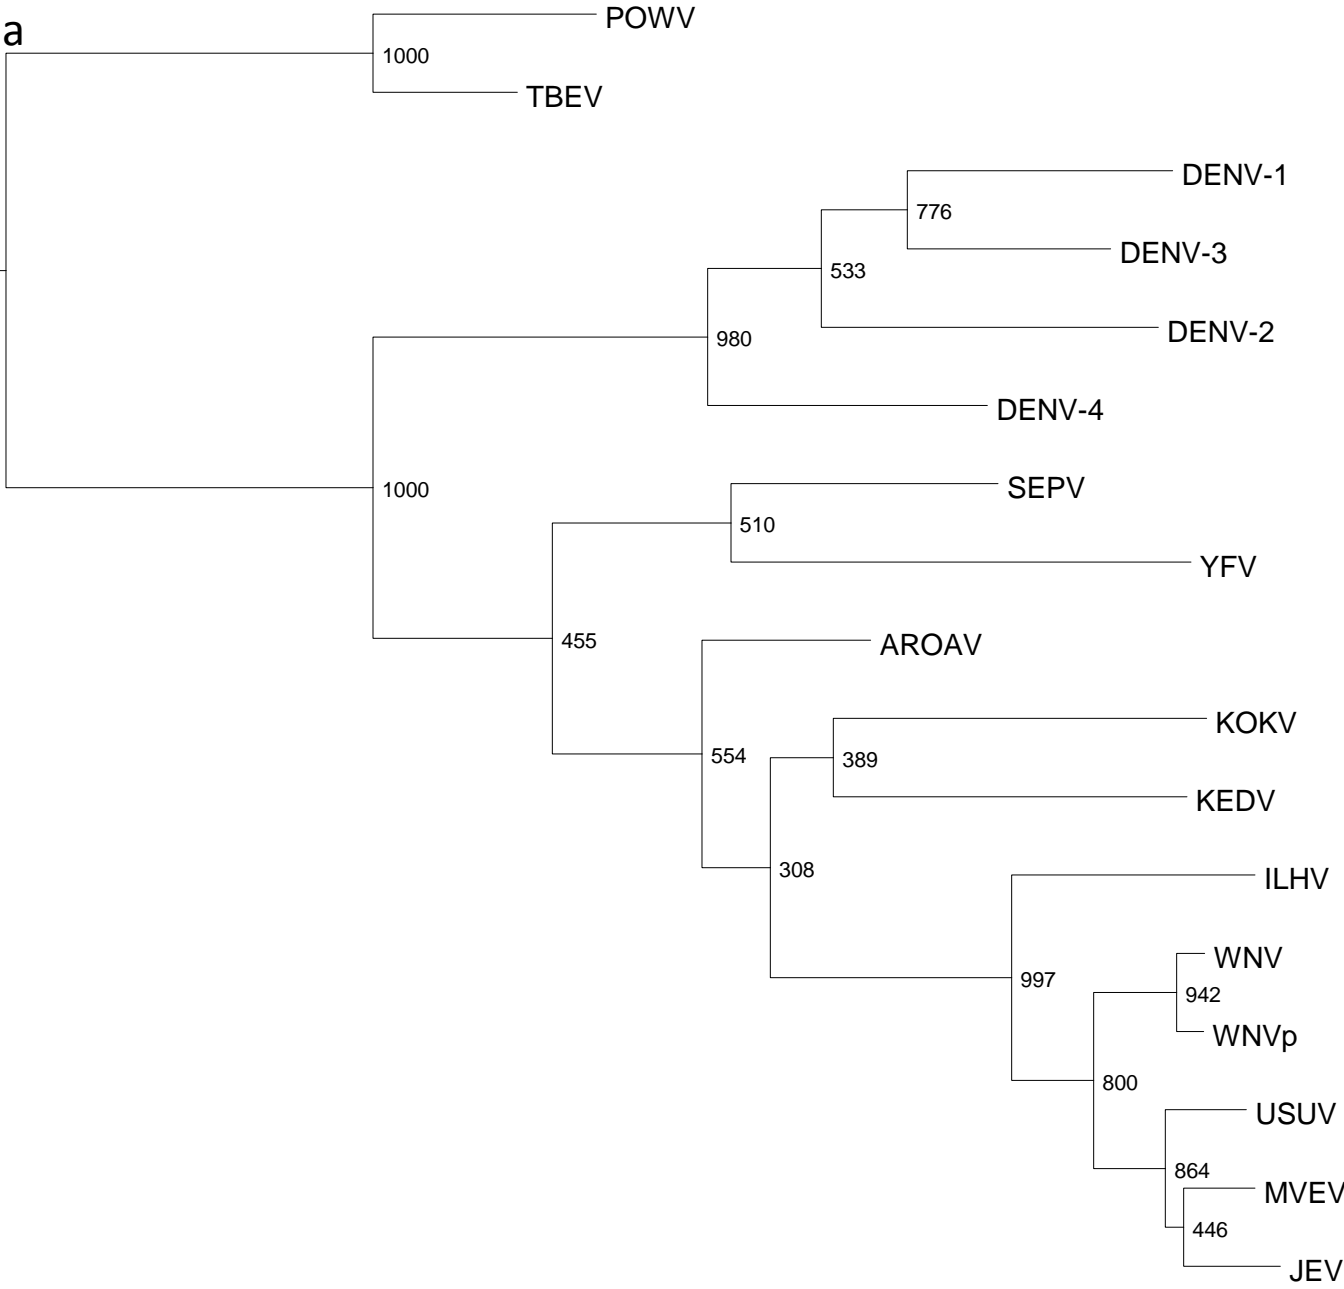

0.4

Figure 1F. NS2b

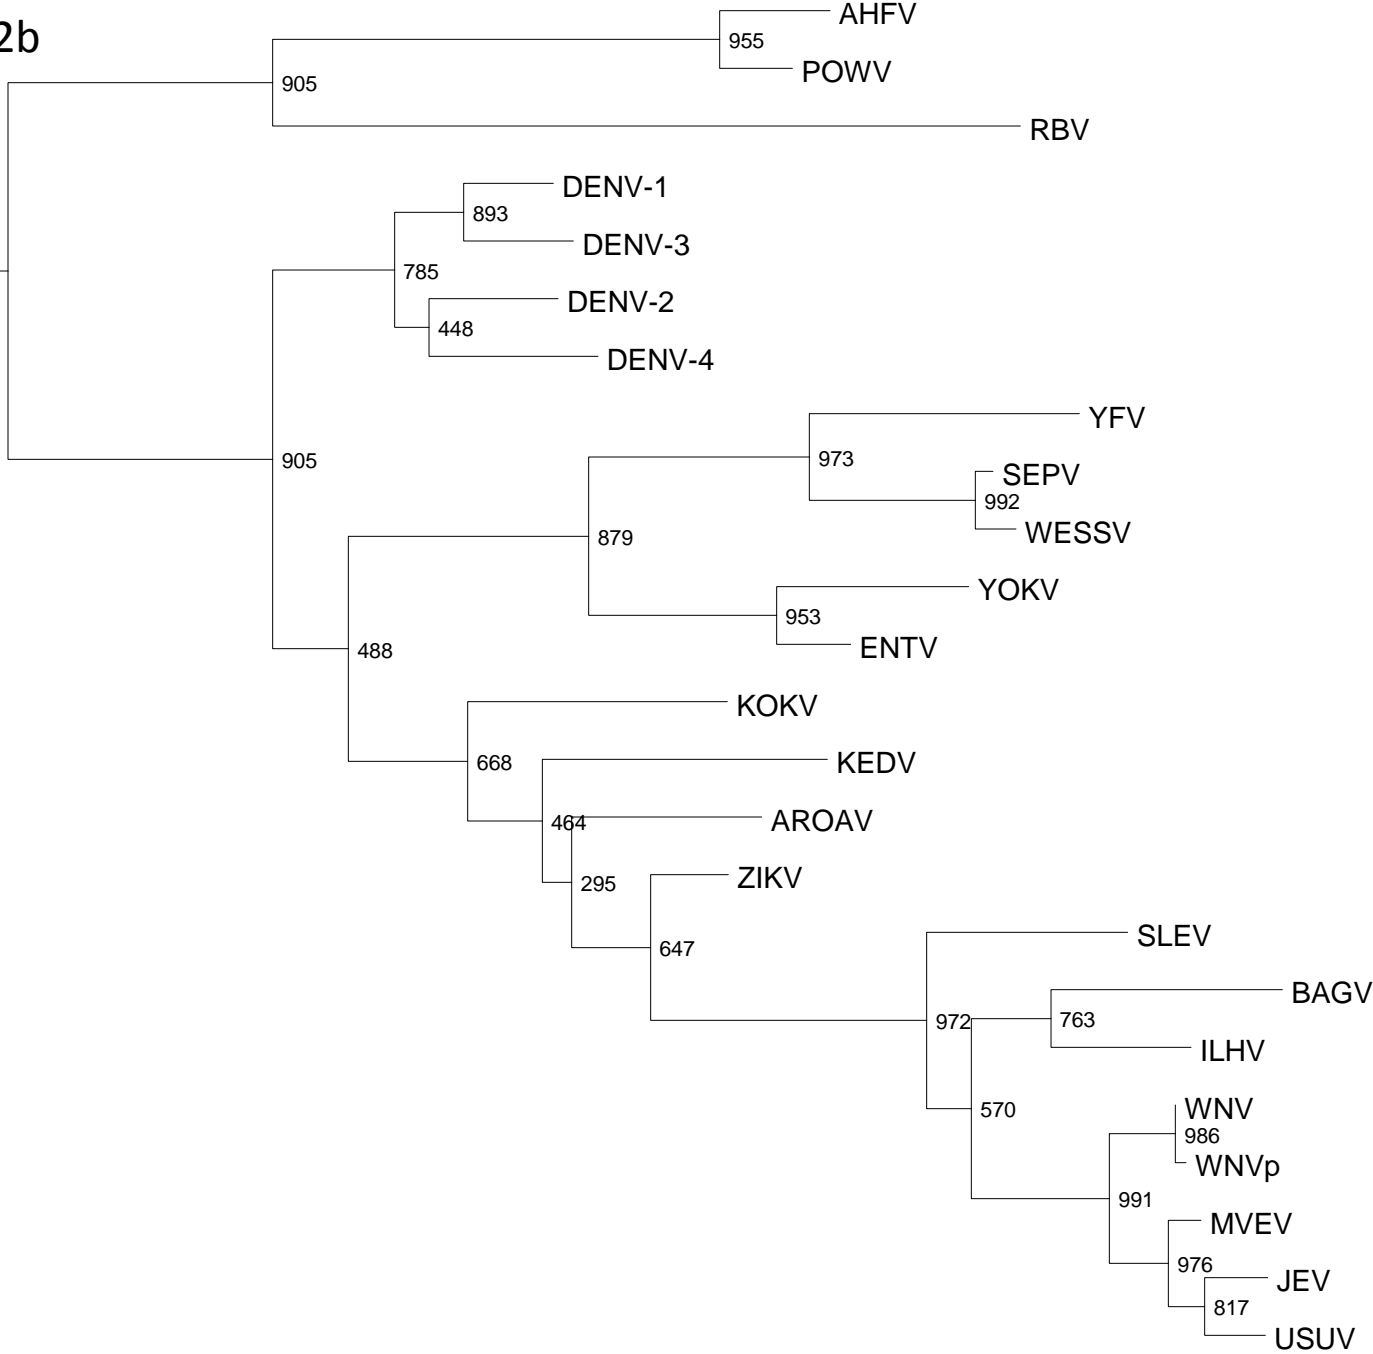

0.5

Figure  
1G. NS3

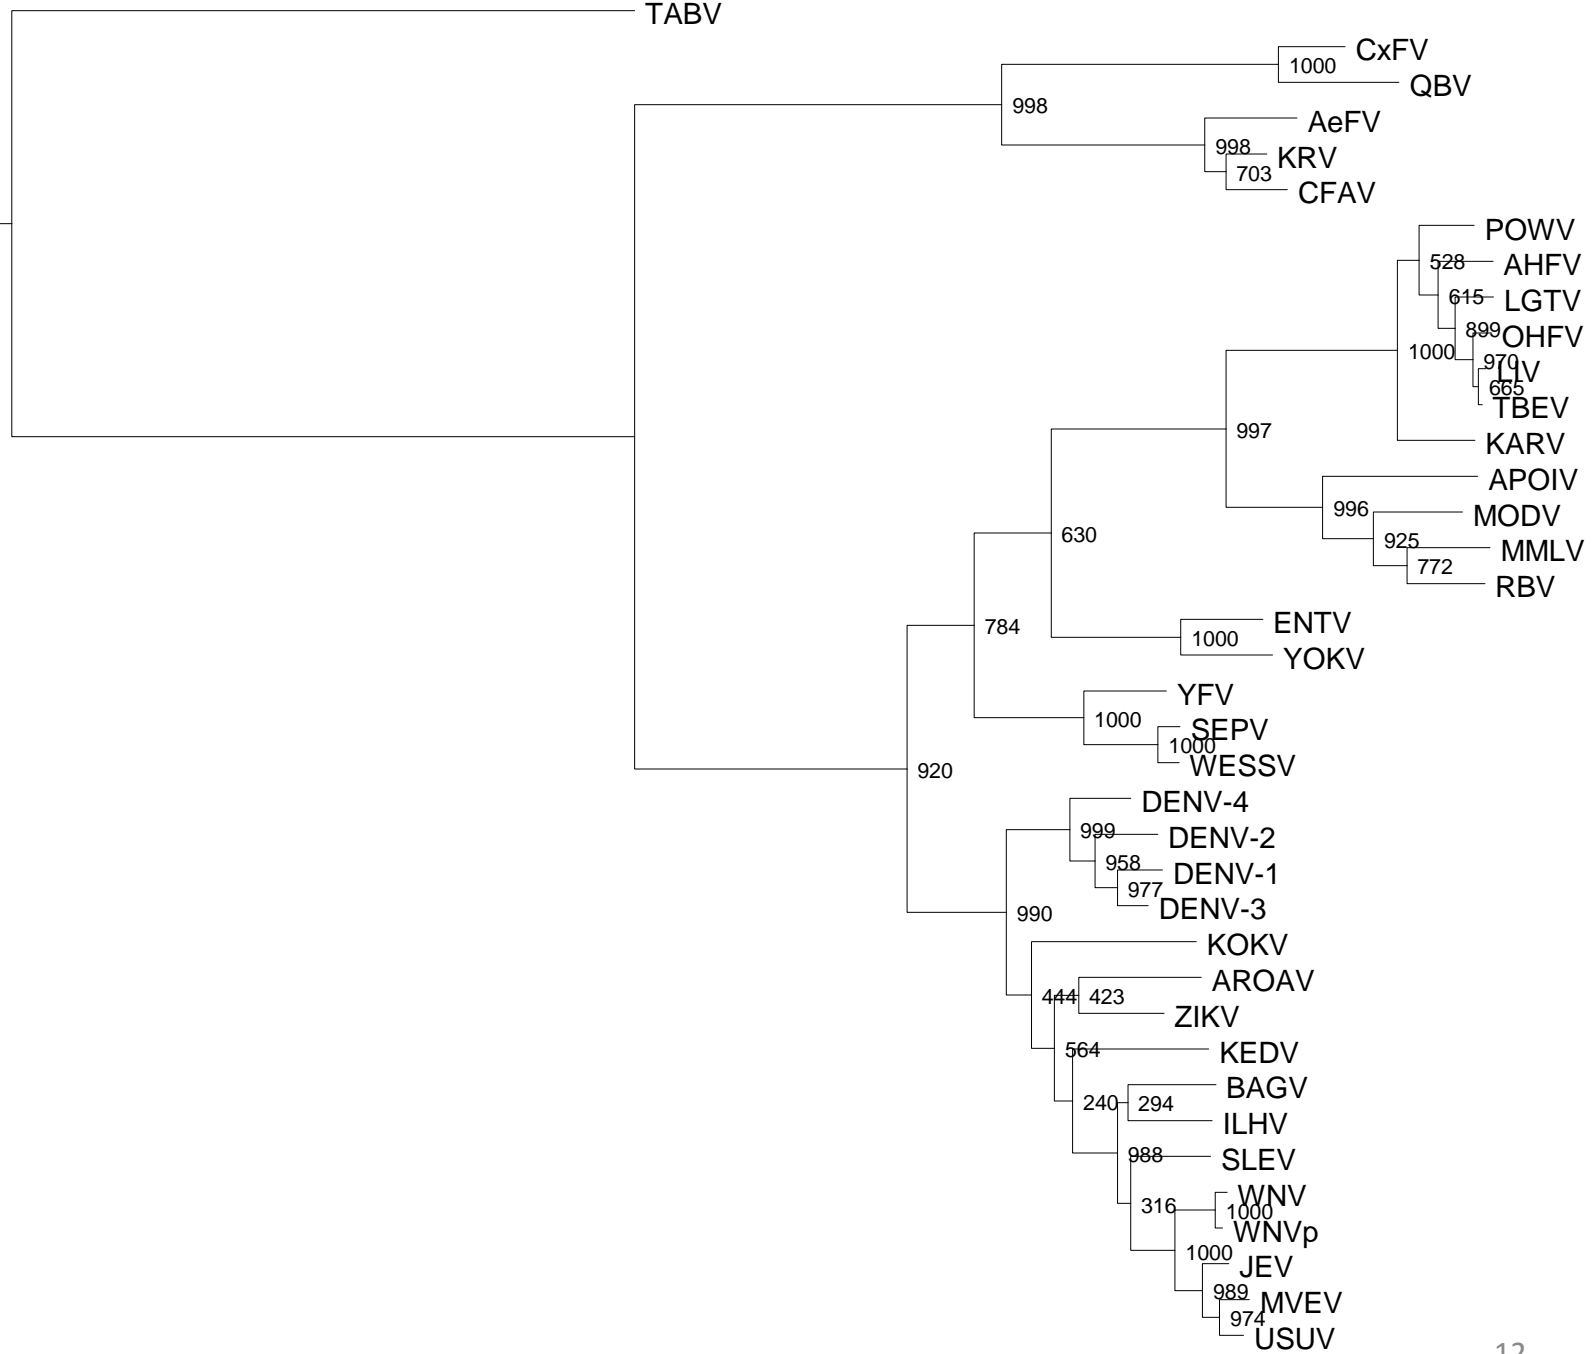

0.5

Figure 1H. NS4a

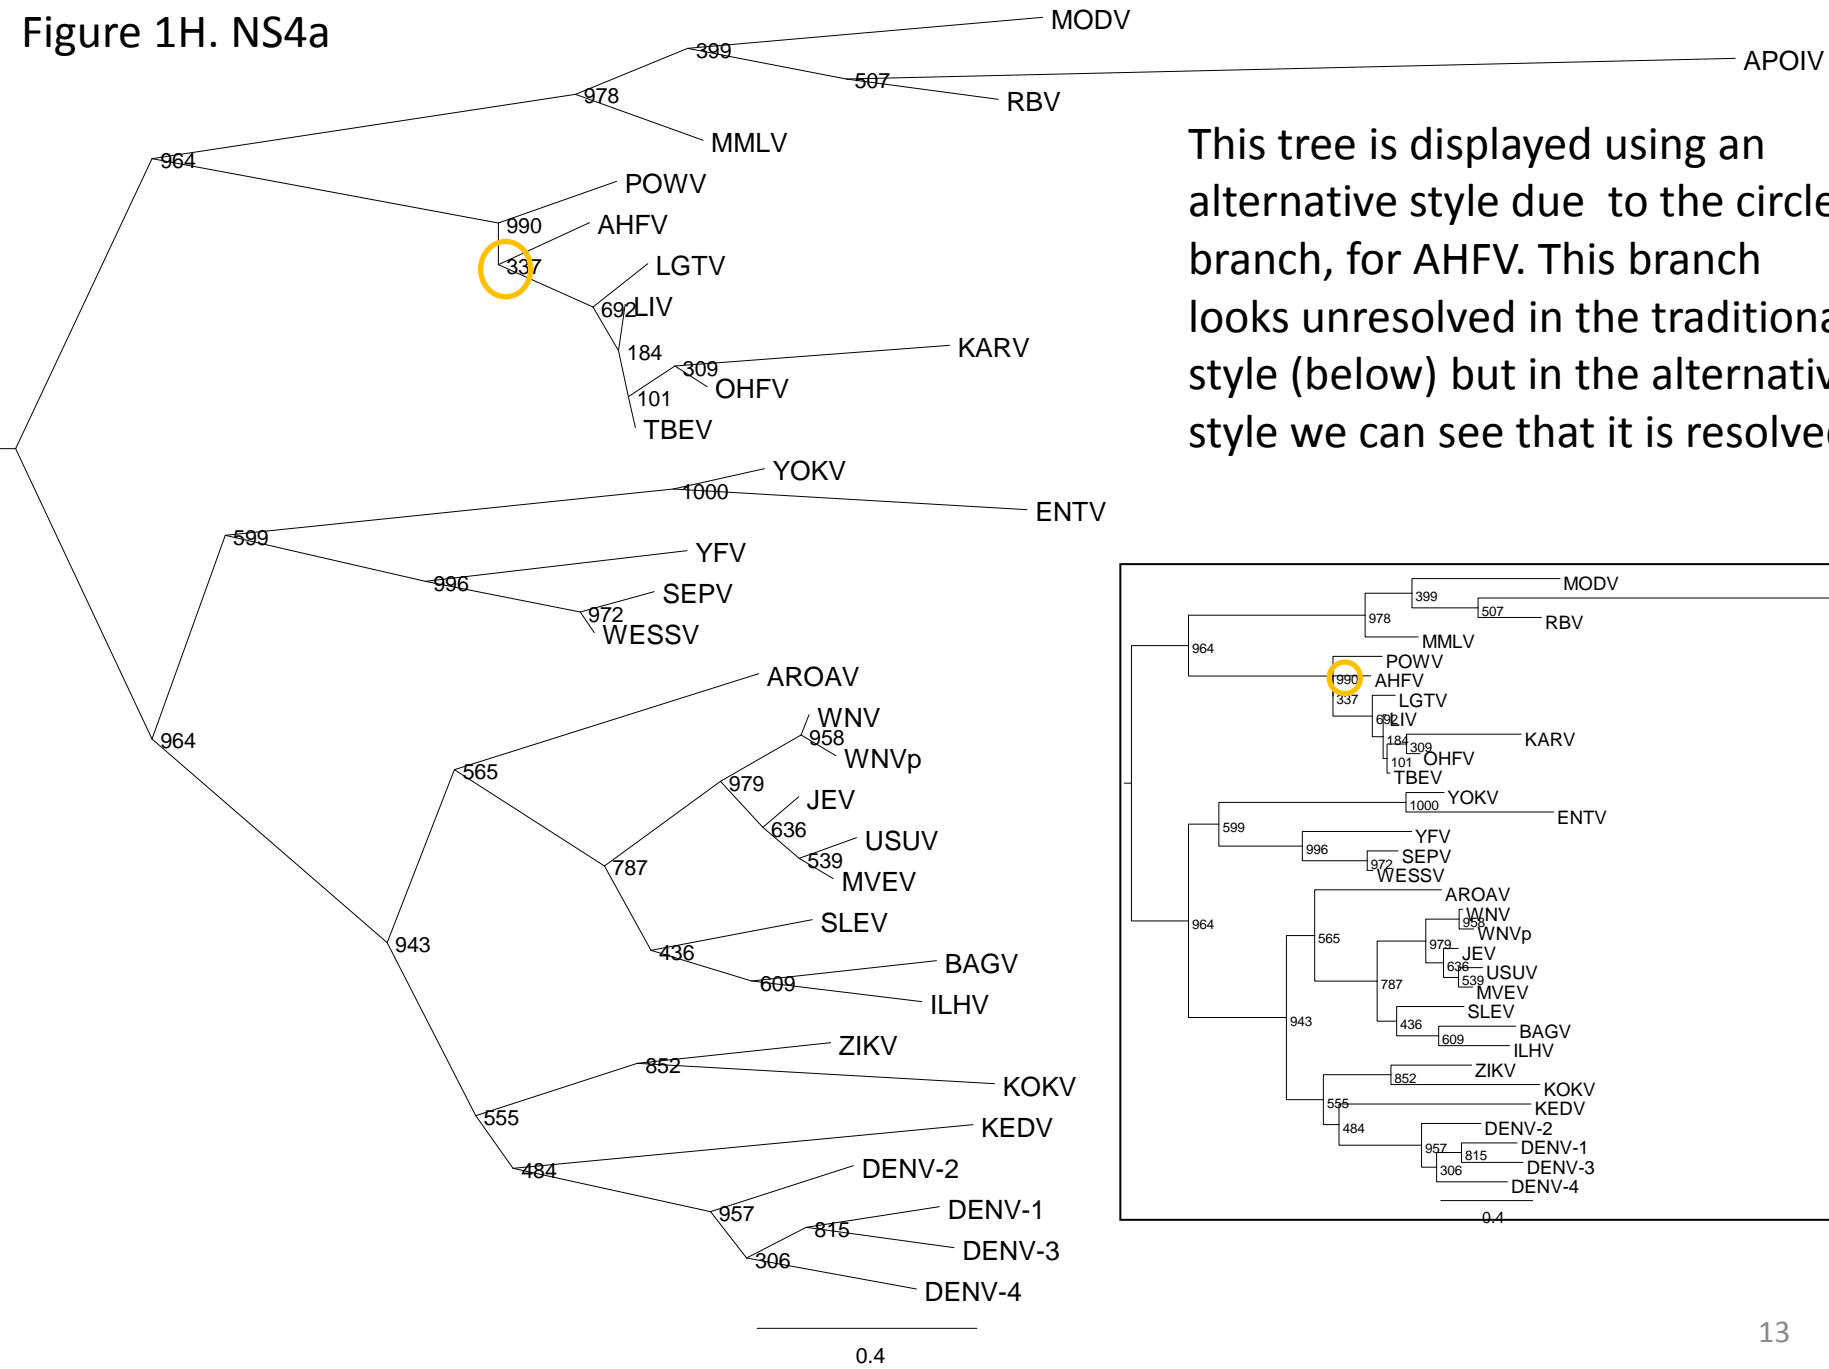

This tree is displayed using an alternative style due to the circled branch, for AHFV. This branch looks unresolved in the traditional style (below) but in the alternative style we can see that it is resolved.

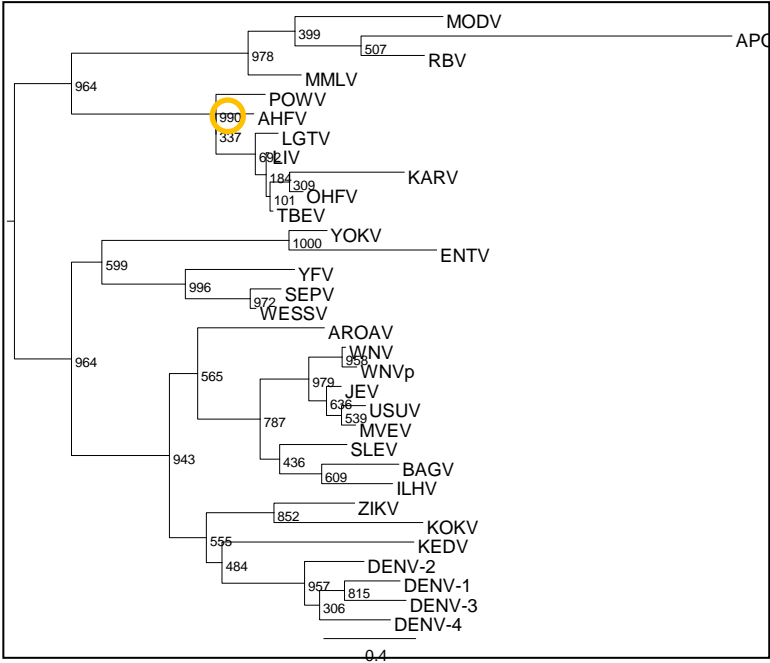

Figure 1I. NS4b

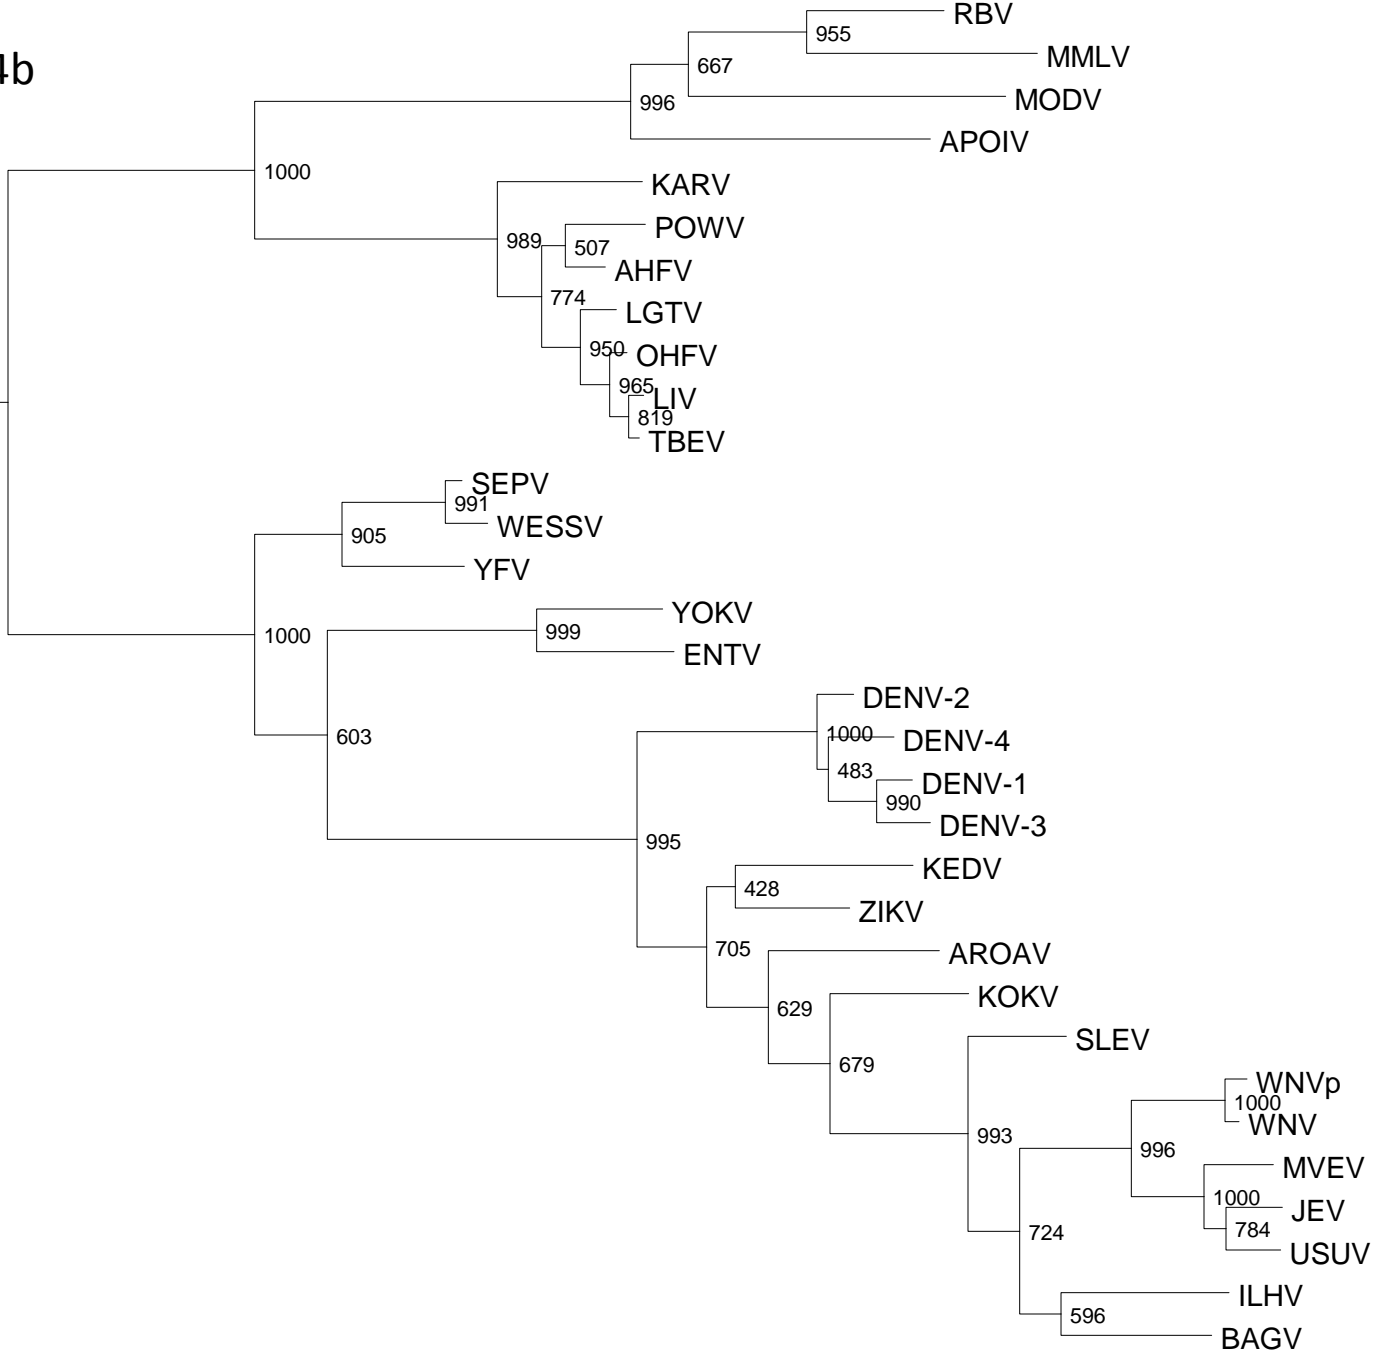



# Figure 2.

The heatmap shows the continuous Iupred predictions. Dark blue means more ordered, light blue means less order, but not disorder. White is the 0.4 cutoff between order and disorder. Light pink means little disorder and red means more disorder. The sequences are shown according to where they fall in the phylogeny. Simplifying the continuous data in the heatmap to two discrete states: order and disorder, using the 0.4 cut off and analyzing the sites across the phylogeny using parsimony as implemented in GLOOME gives the disorder to order transition (DOT) per site and node in the bar graph on top of the heatmap. In the phylogenetic tree on the right, the numbers along the branches represents the fraction of sites with DOTs per branch using GLOOME. The branch lengths are scaled to represent sequence divergence.



Figure 2A.

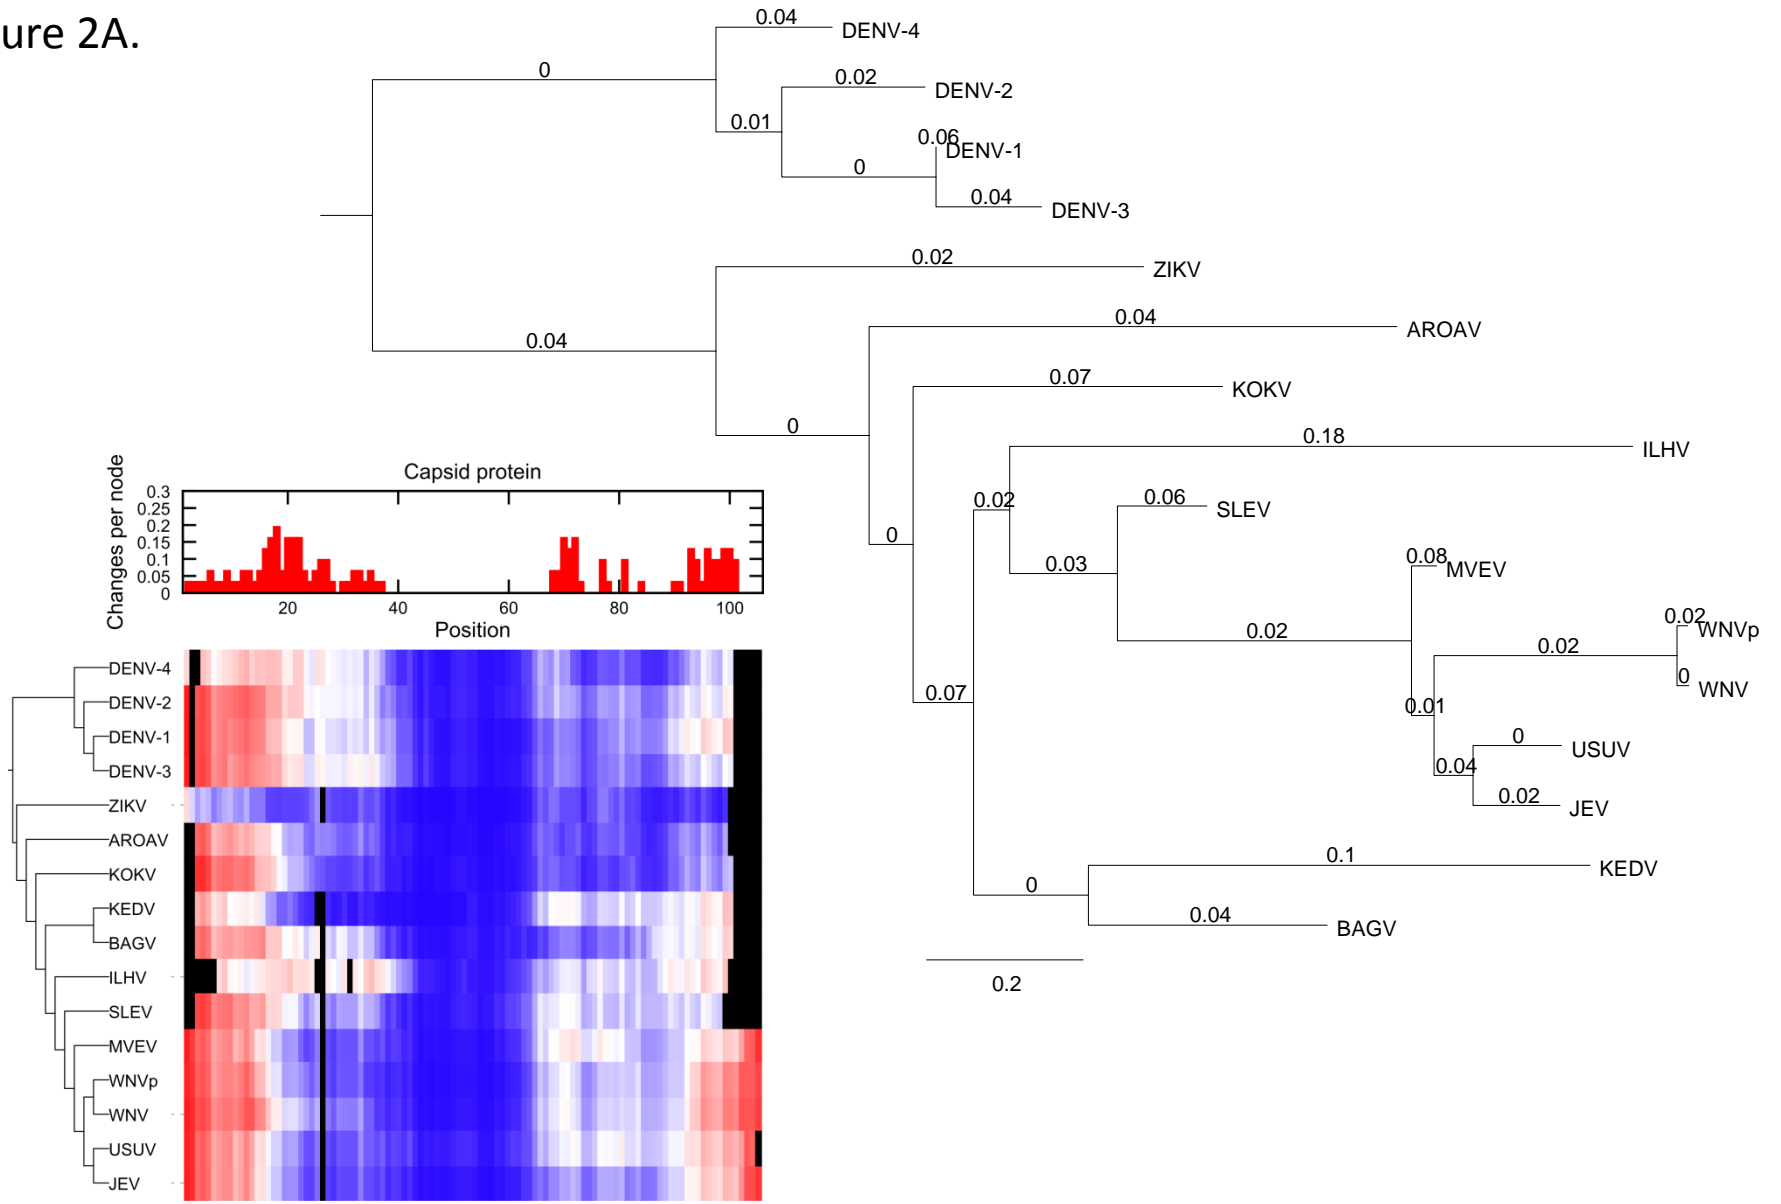



Figure 2C.

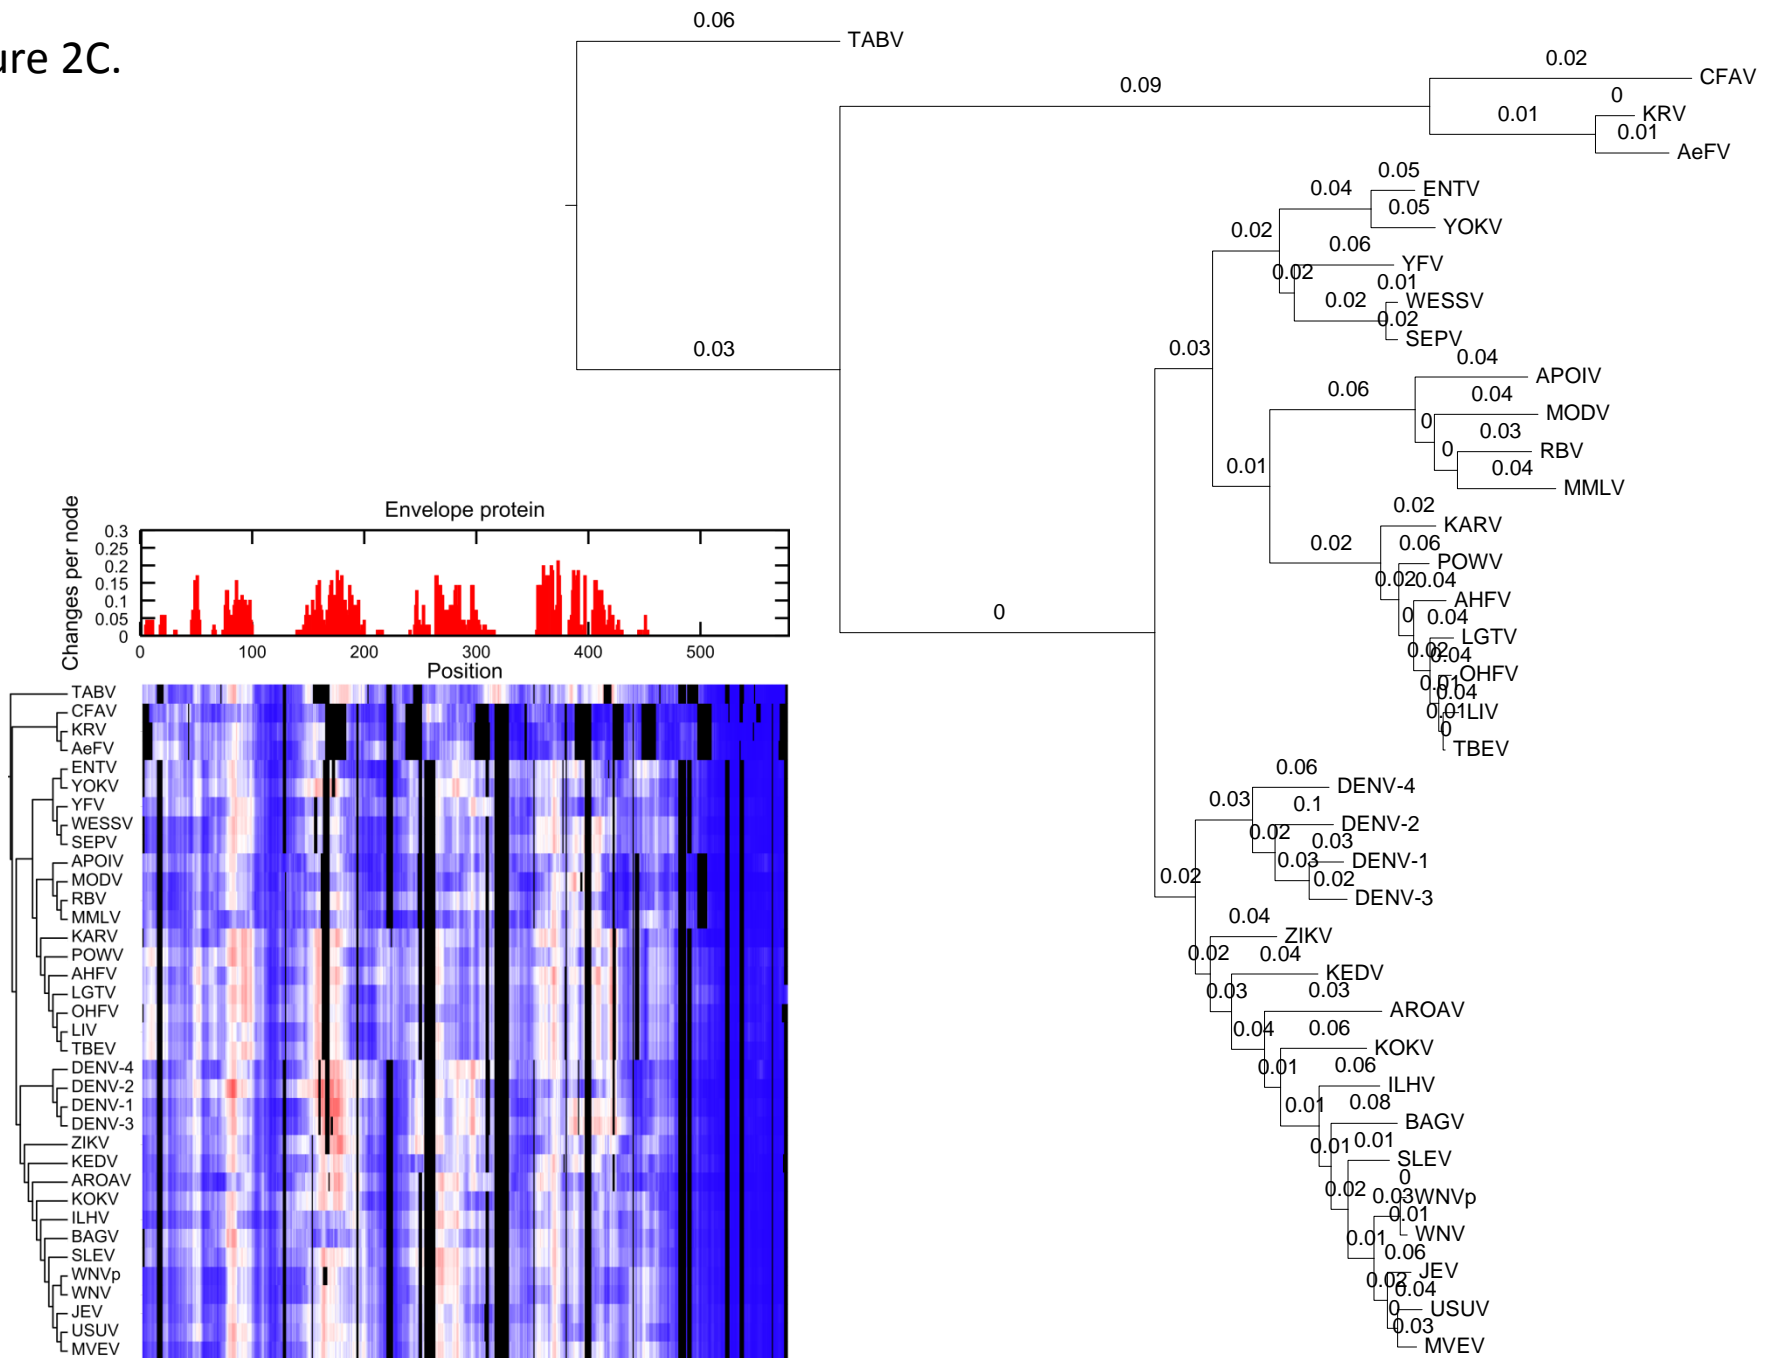



Figure 2E.

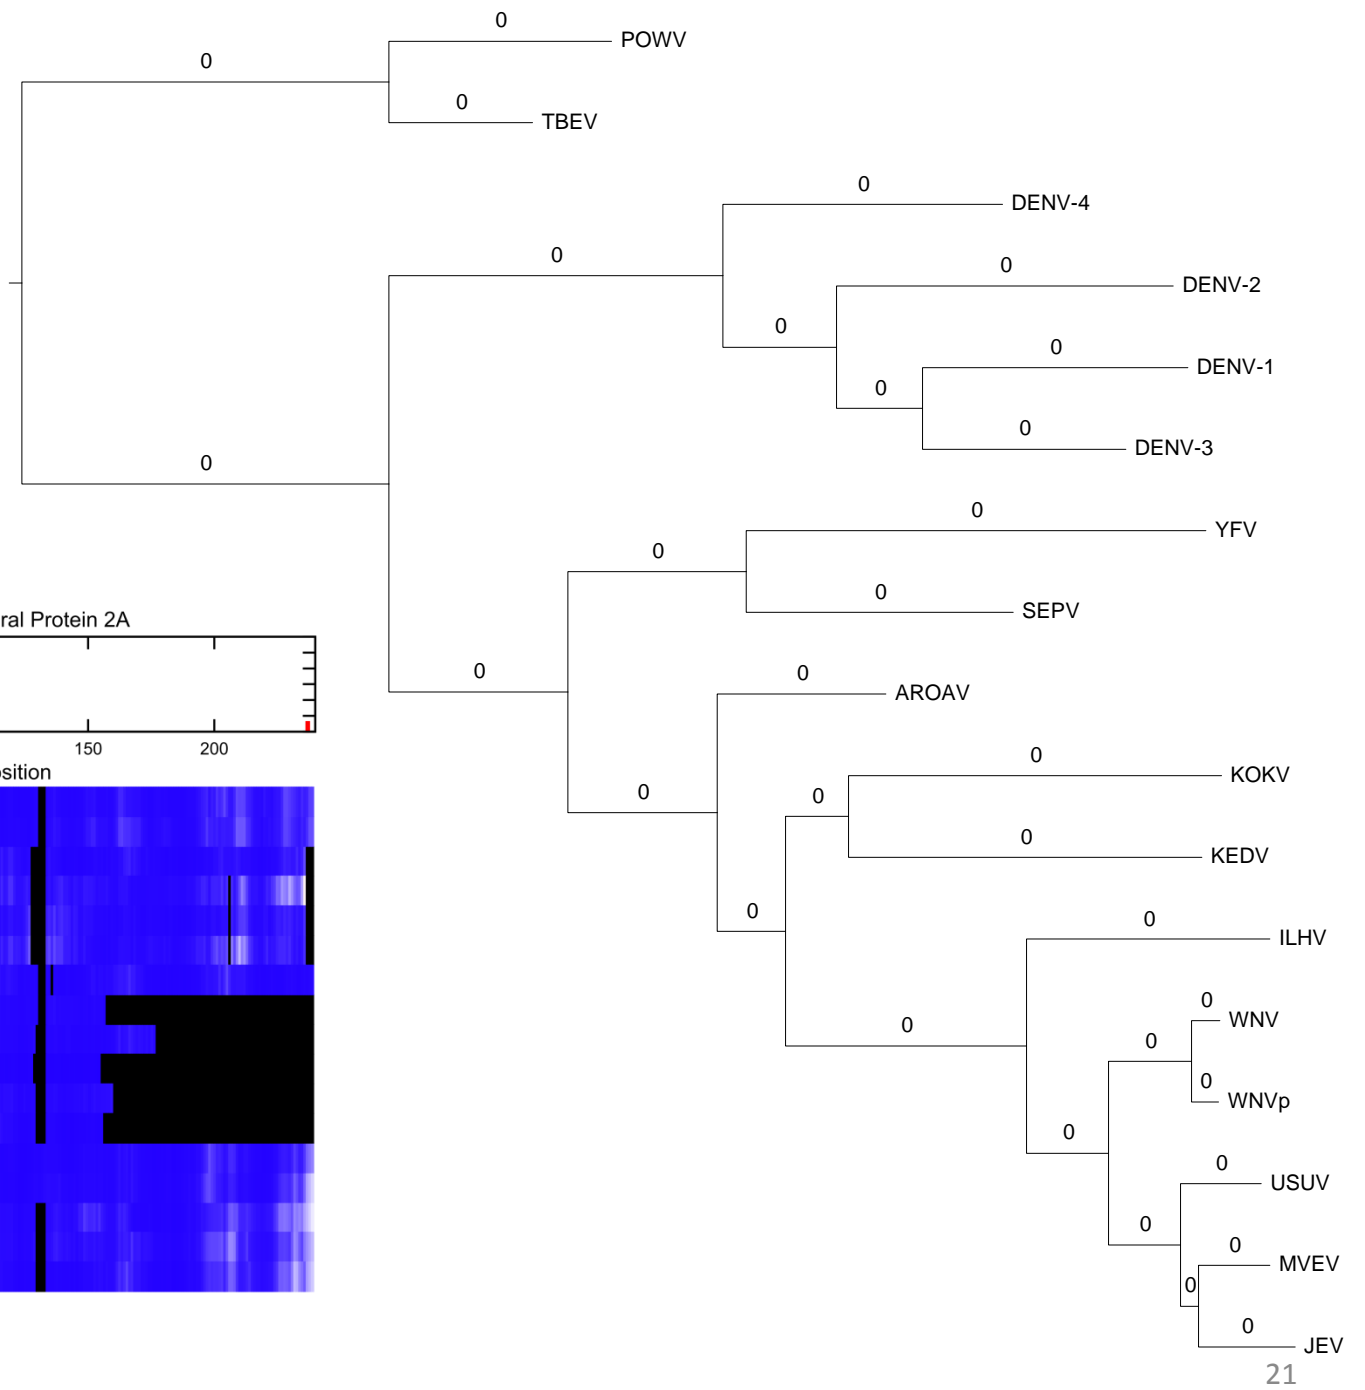

0.3

Figure 2F.

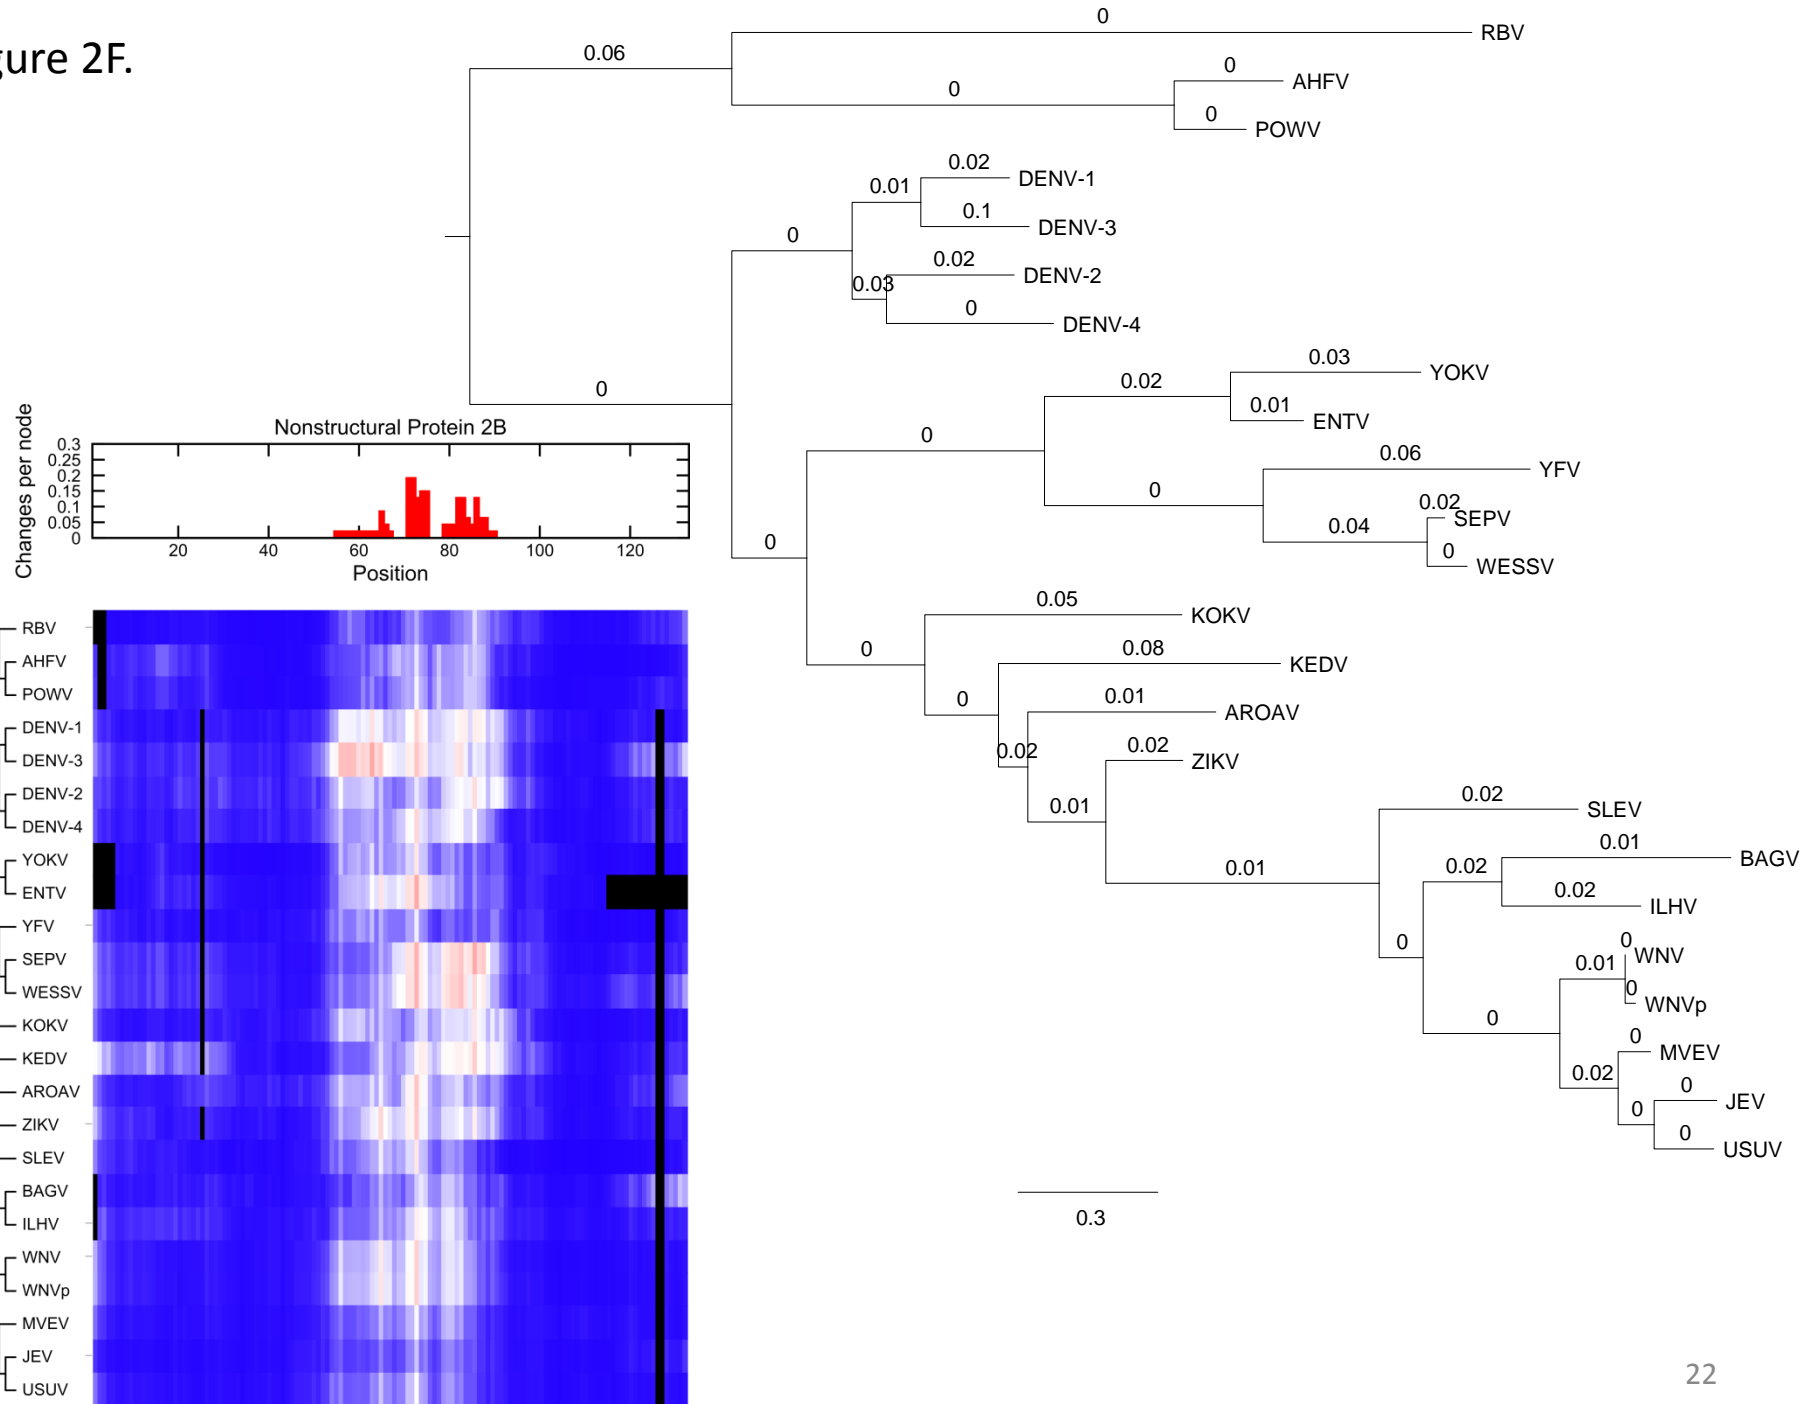

Figure 2G.

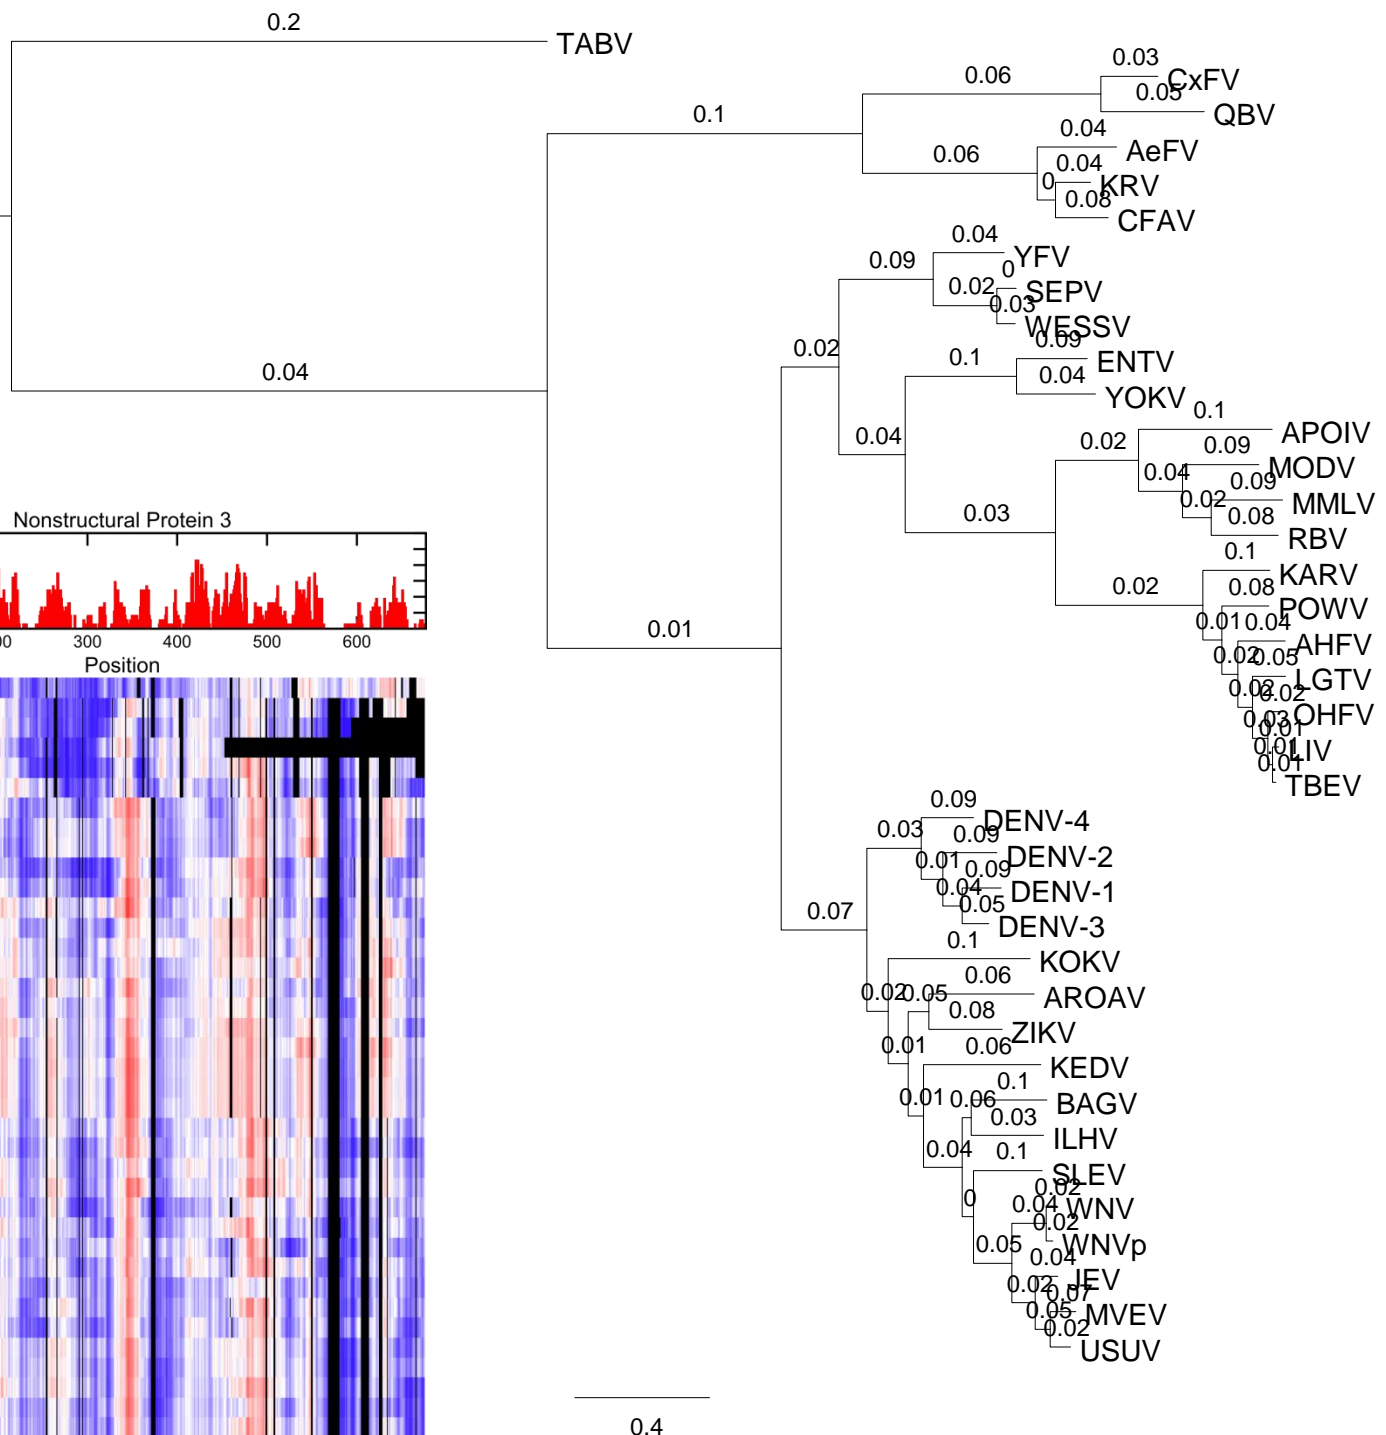

Figure 2H.

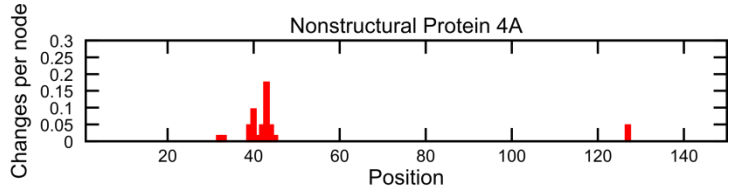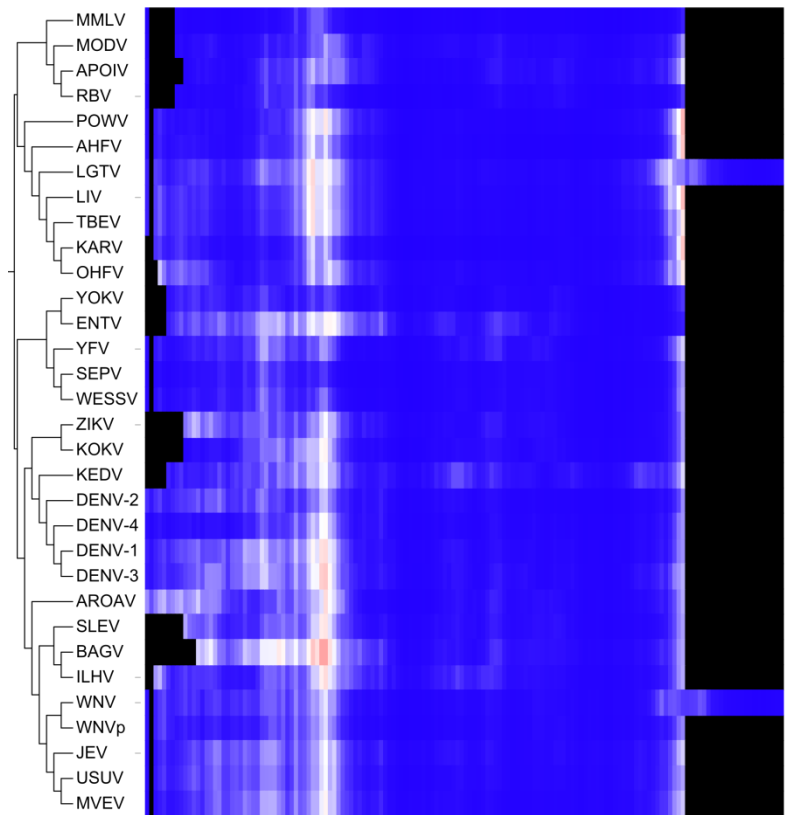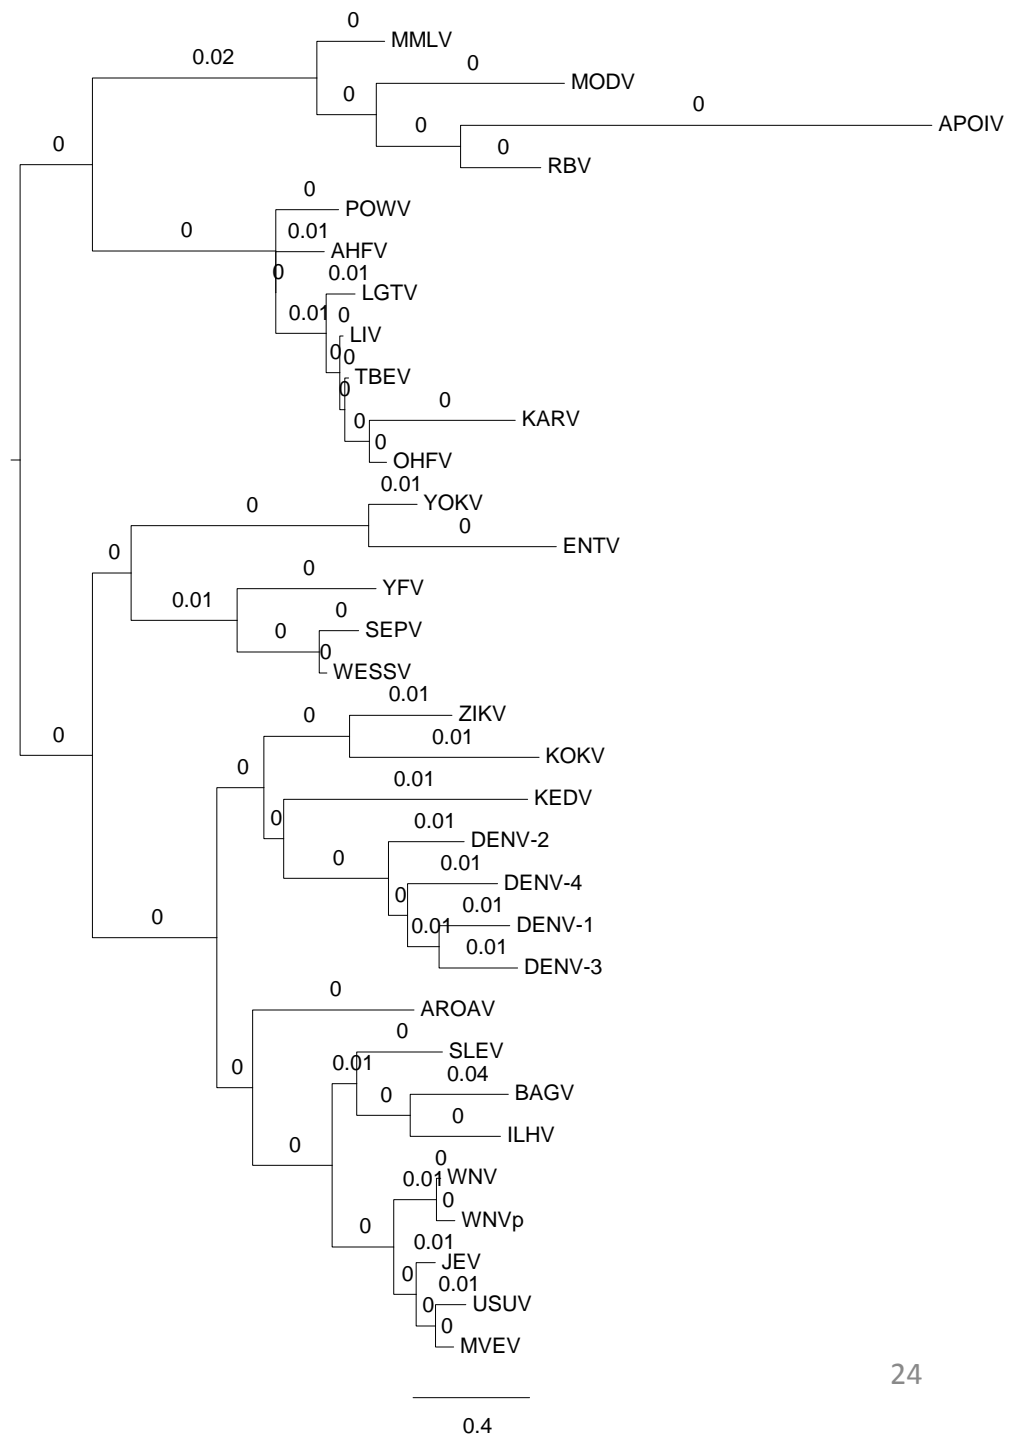



Figure 2I.

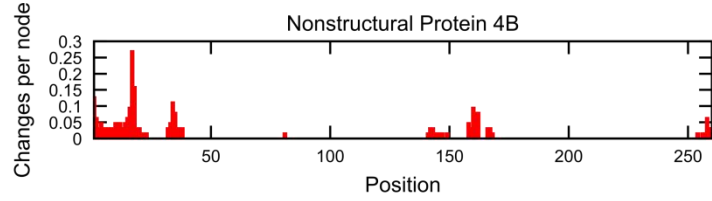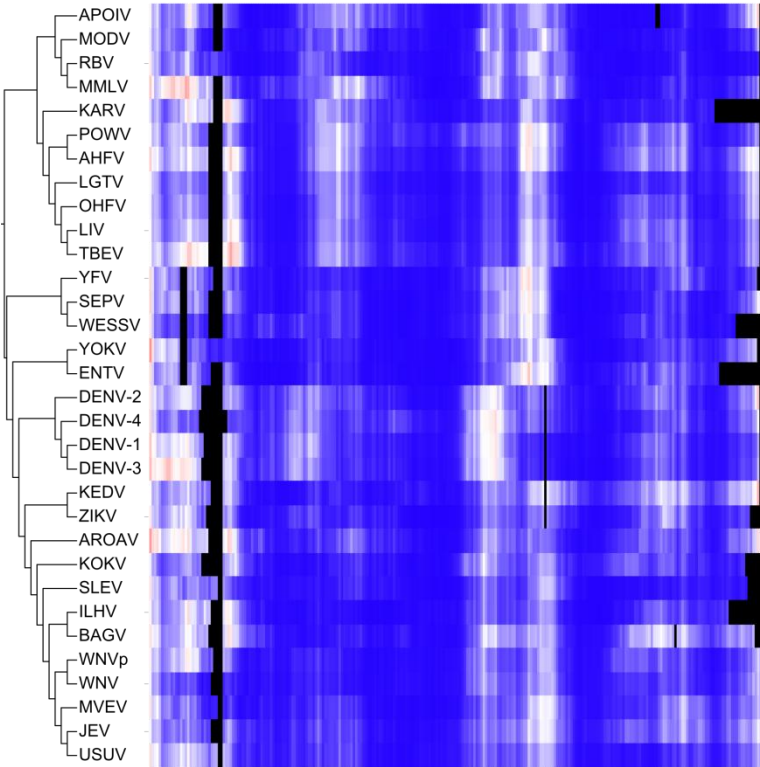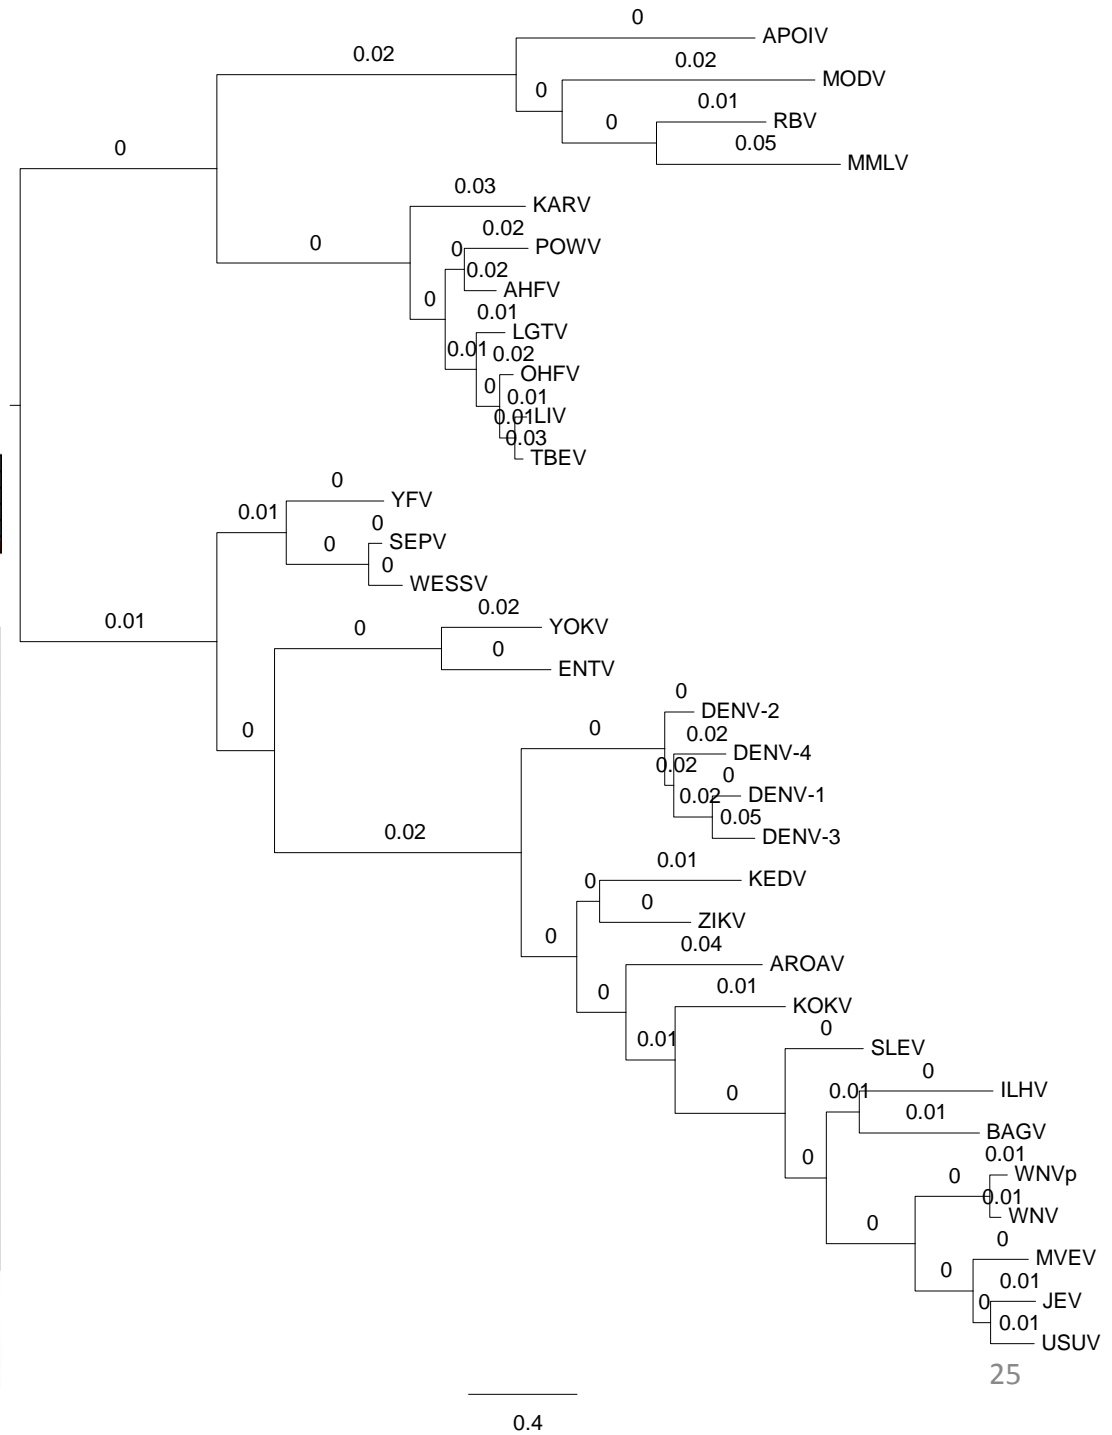



# Figure 3.

The heatmap shows the continuous IUPred predictions. Dark blue means more ordered, light blue means less order, but not disorder. White is the 0.4 cutoff between order and disorder. Light pink means little disorder and red means more disorder. The sequences are shown according to where they fall in the phylogeny. Simplifying the continuous data in the heatmap to two discrete states: order and disorder, using the 0.4 cut off and analyzing the sites across the phylogeny using parsimony as implemented in GLOOME gives the disorder to order transition (DOT) per site and node in the bar graph on top of the heatmap. IUPred (left), PONDR-FIT (right), and the error associated with the meta predictor PONDR-FIT (bottom).

Figure 3A.

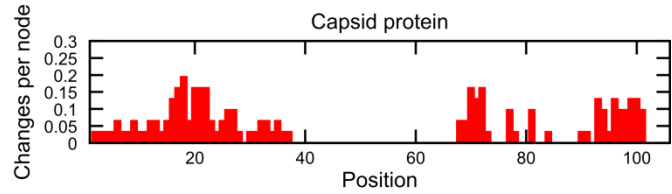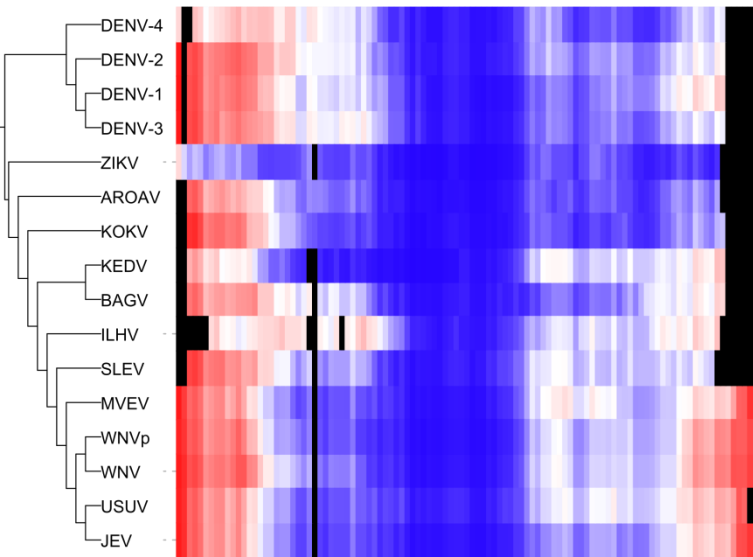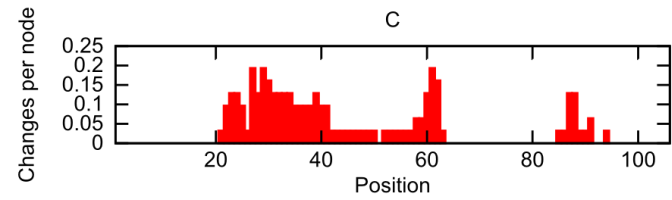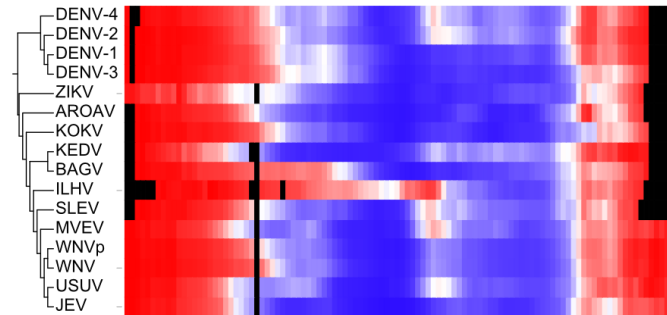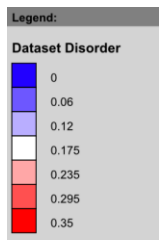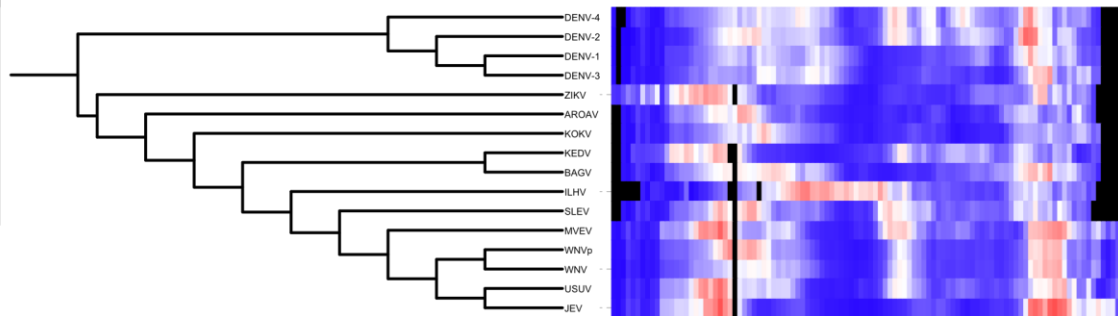

Figure 3B.

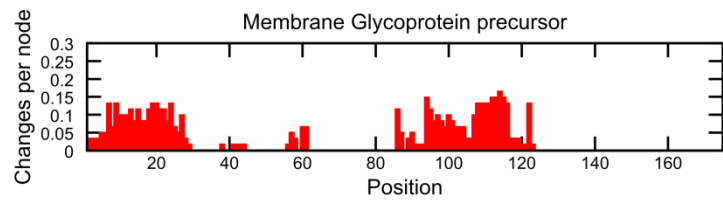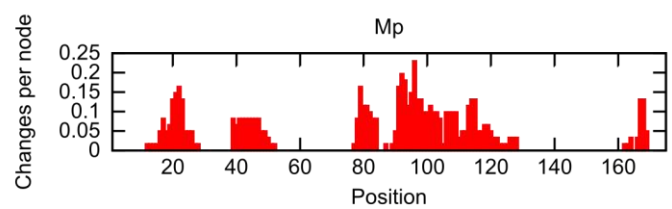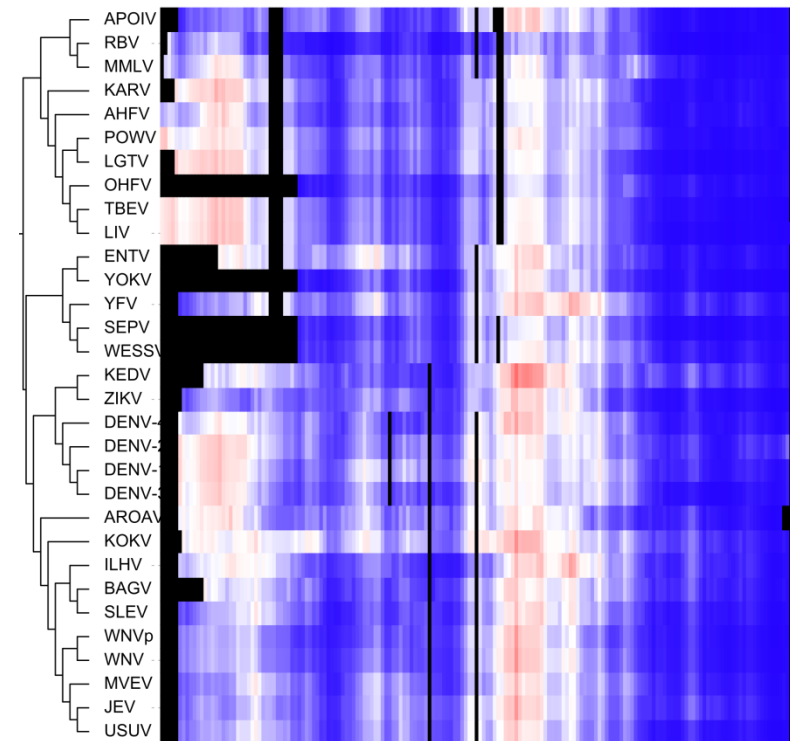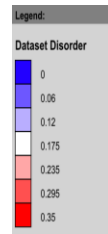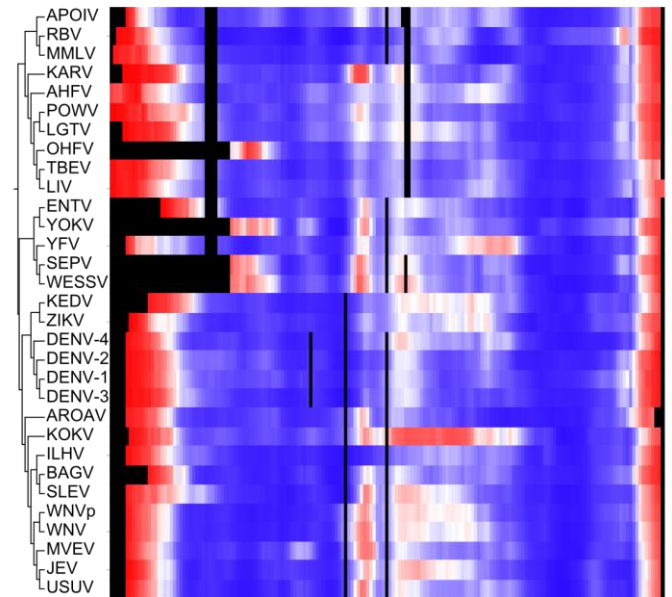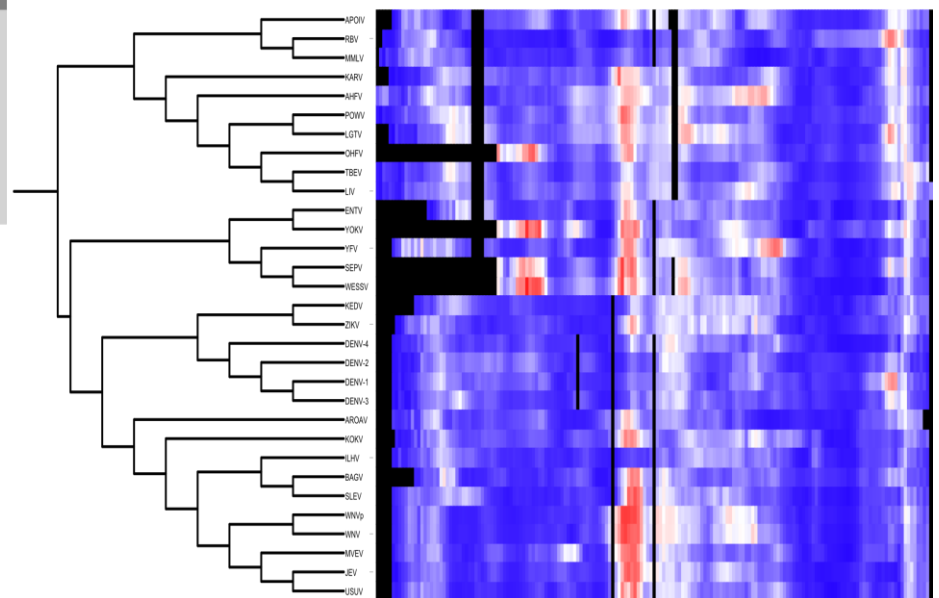

Figure 3C.

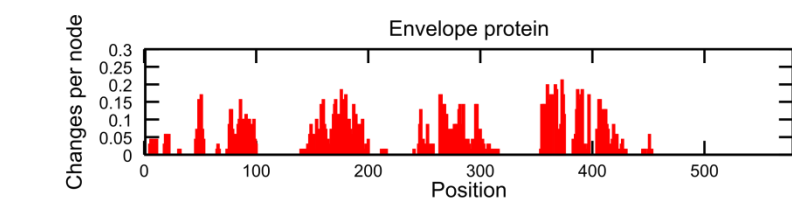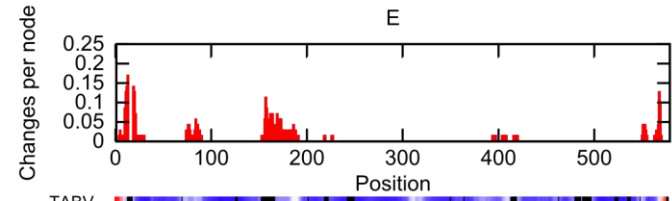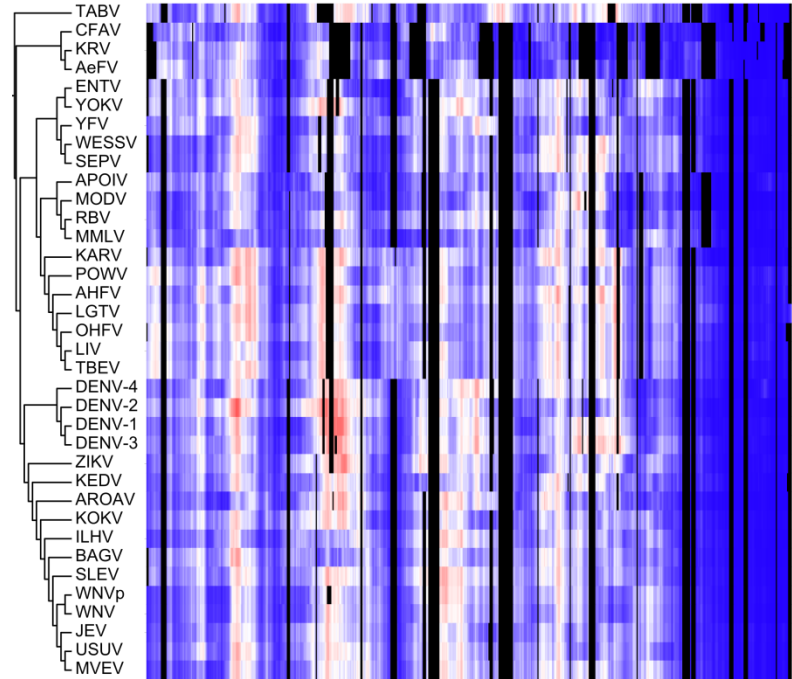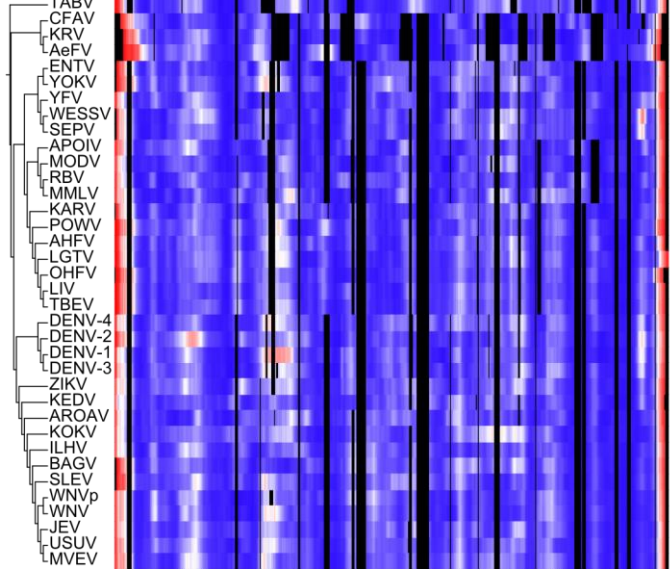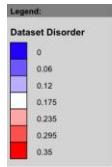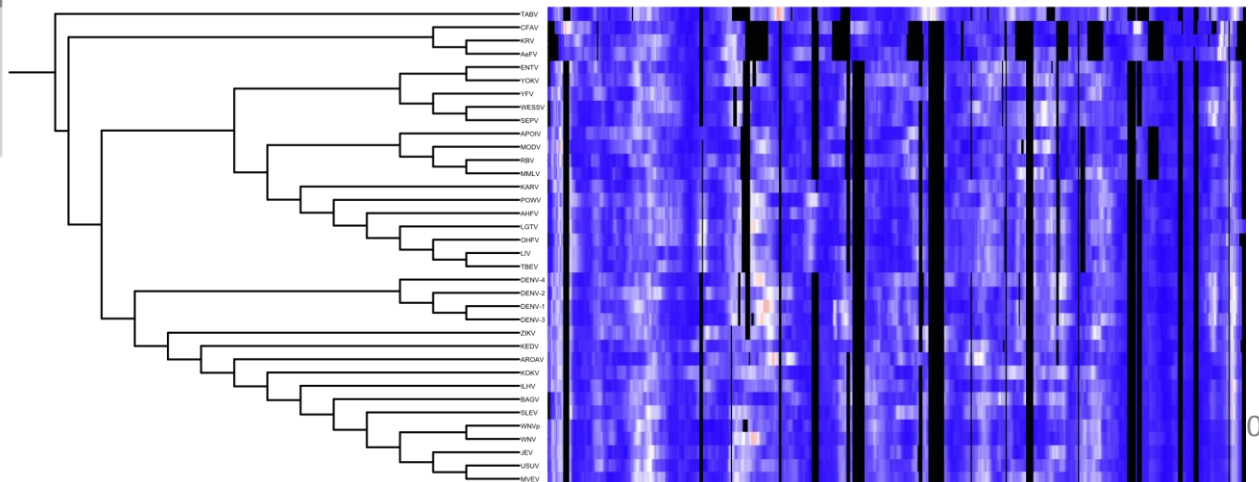



Figure 3D.

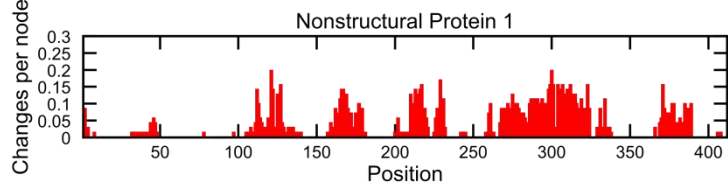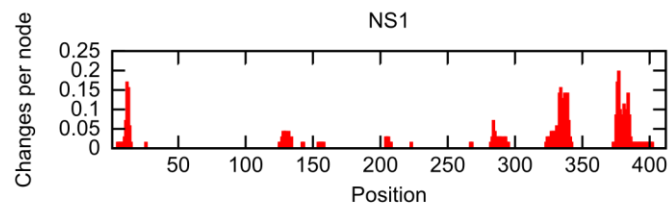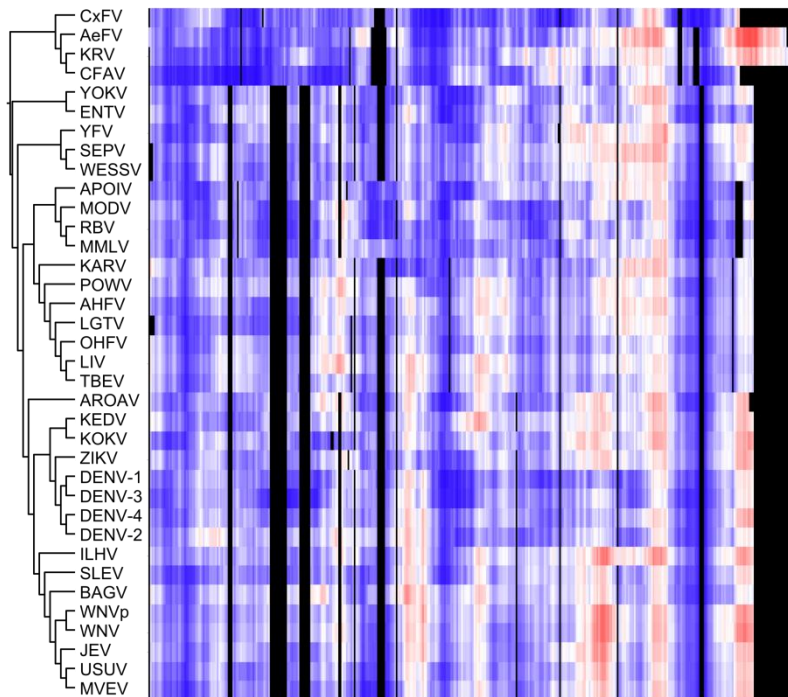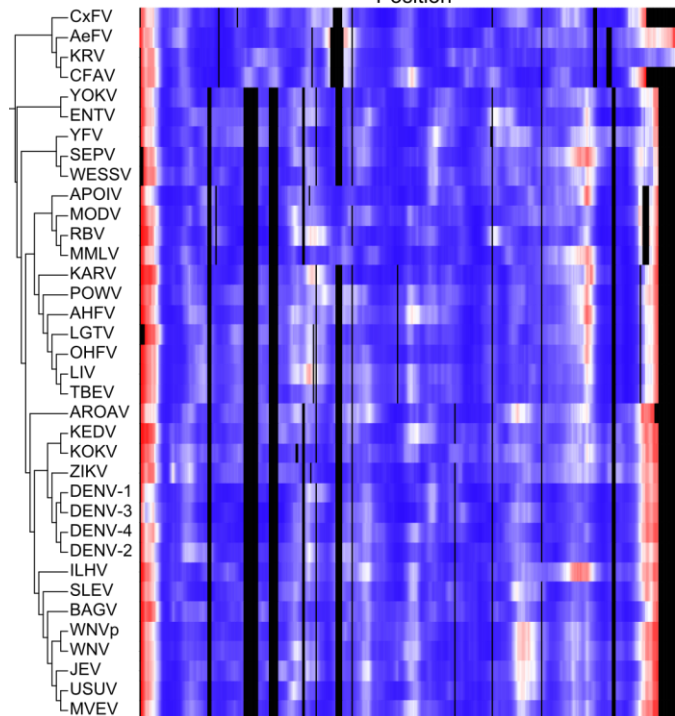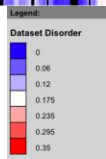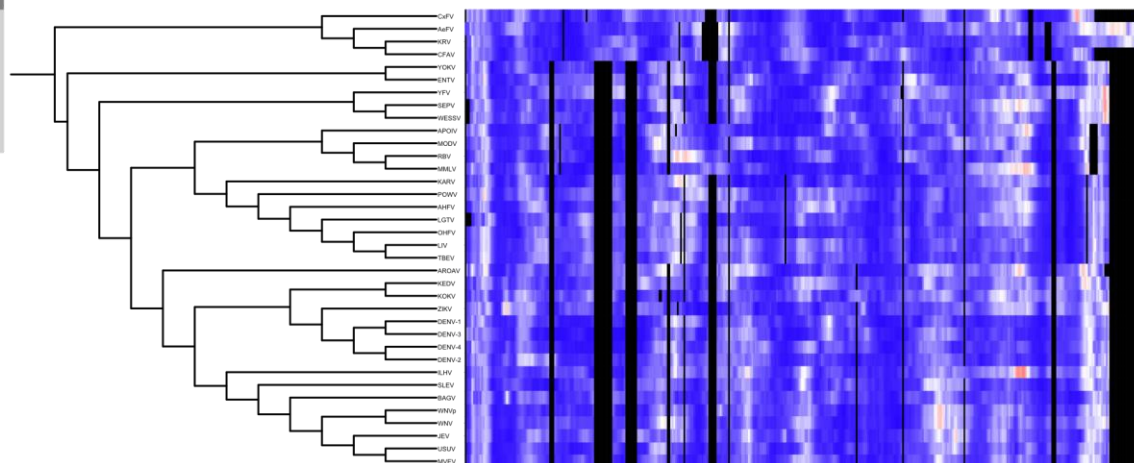

Figure 3E.

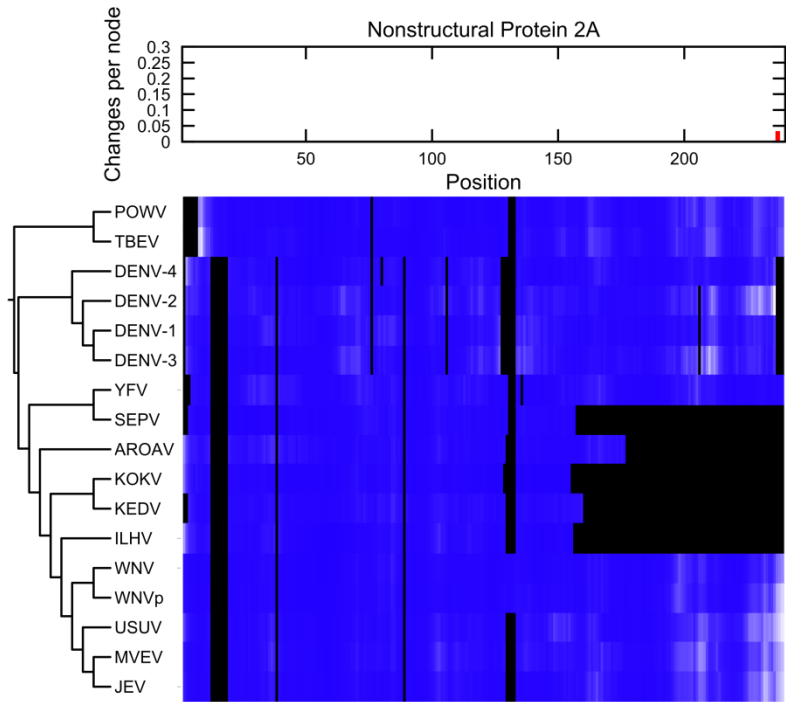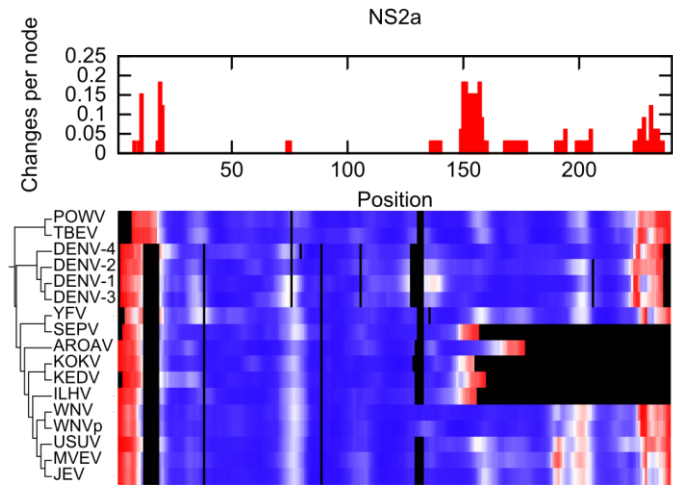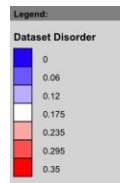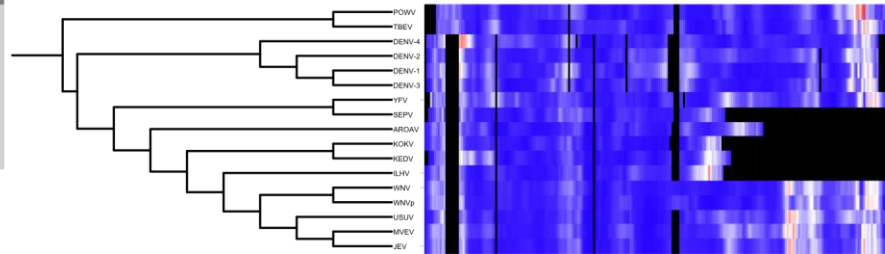



Figure 3F

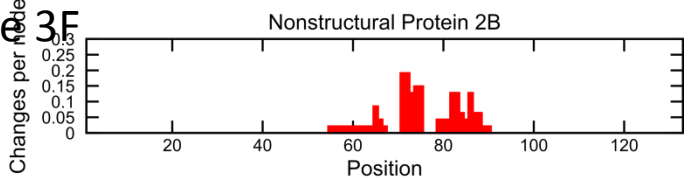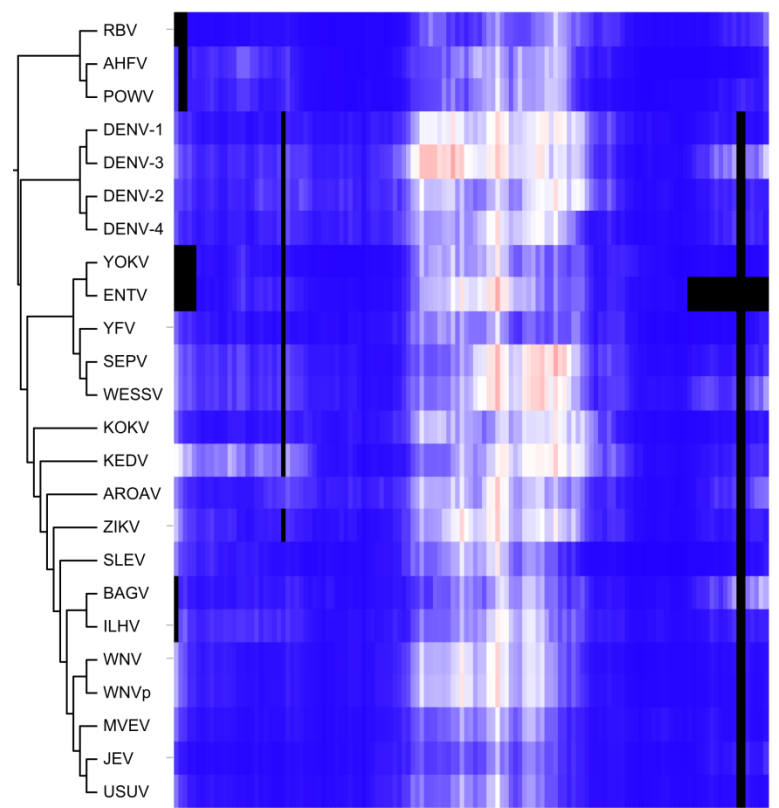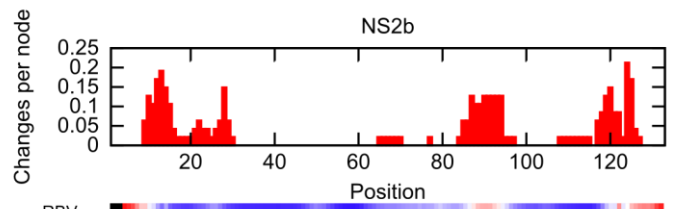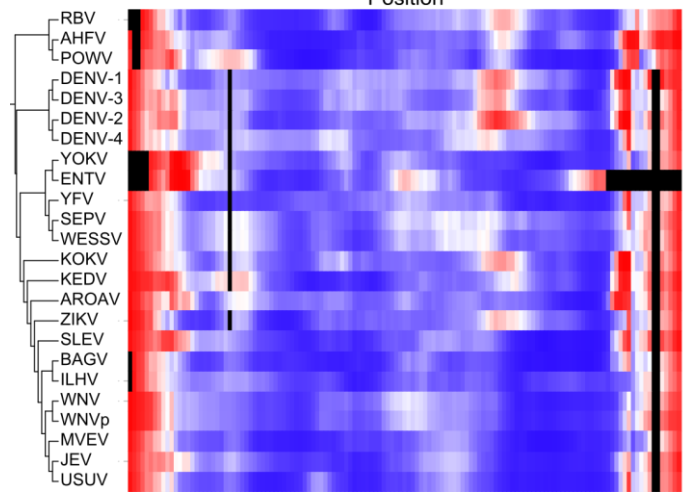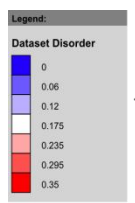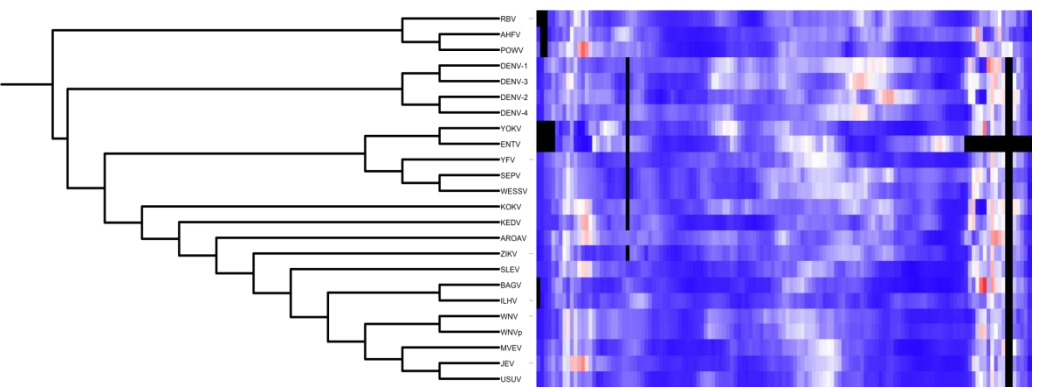

Figure 3G.

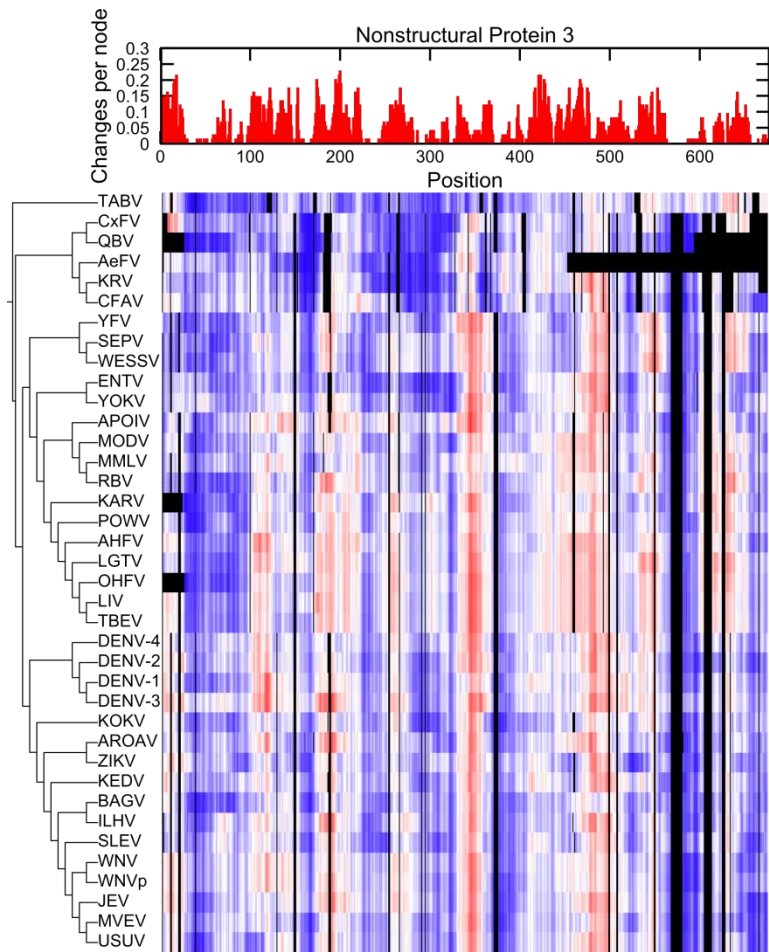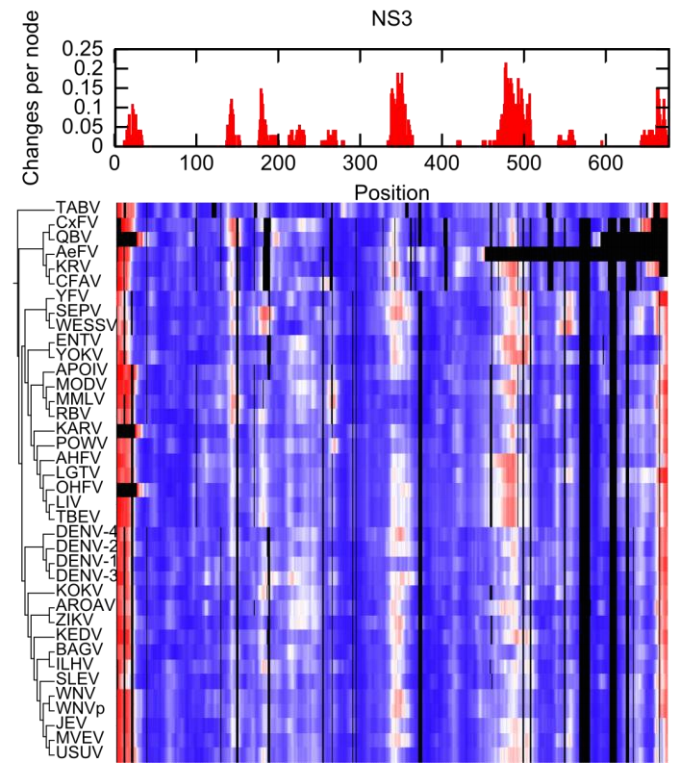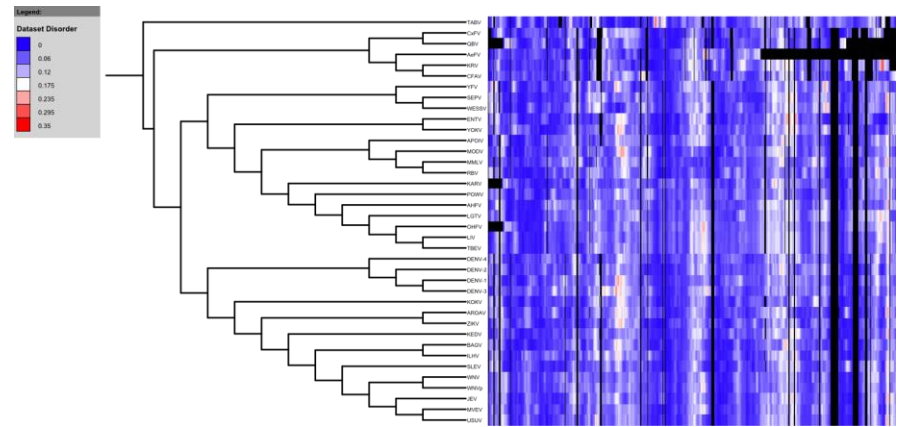

Figure 3H.

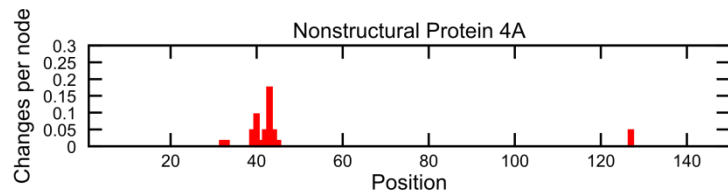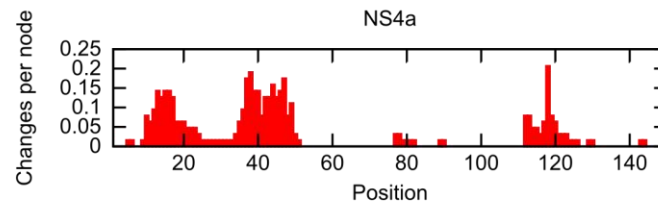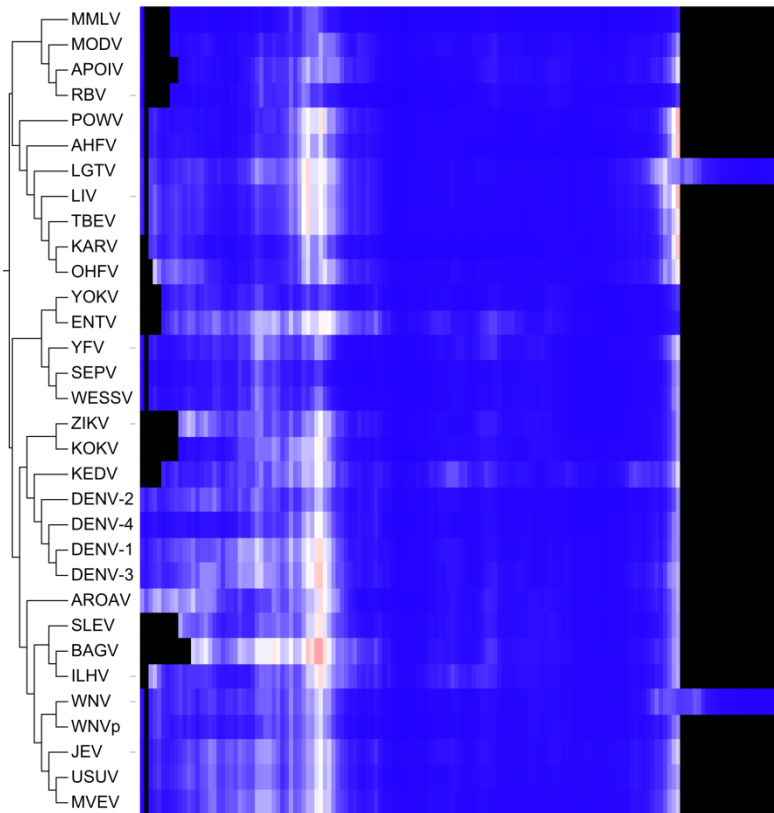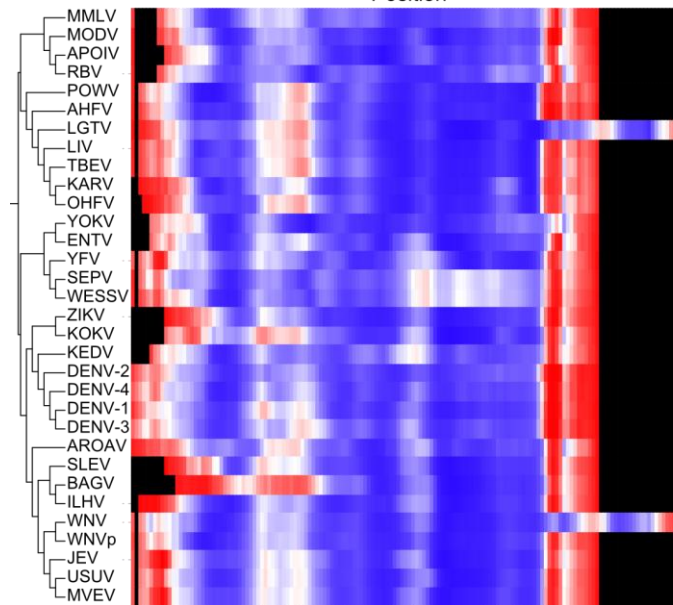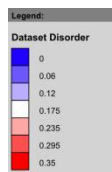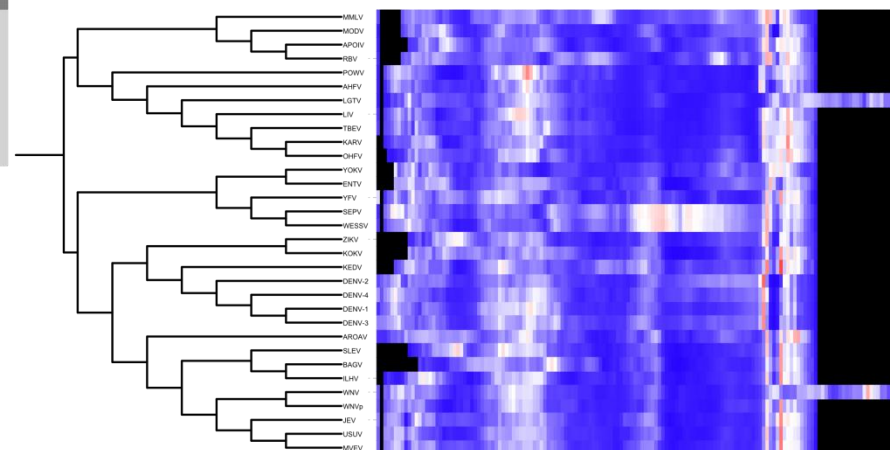

Figure 3I.

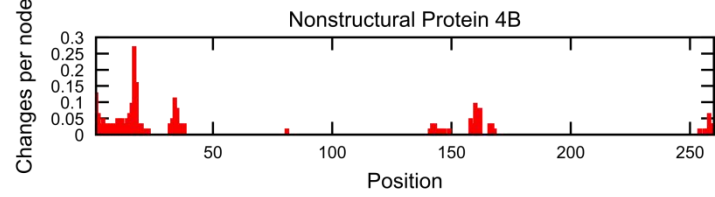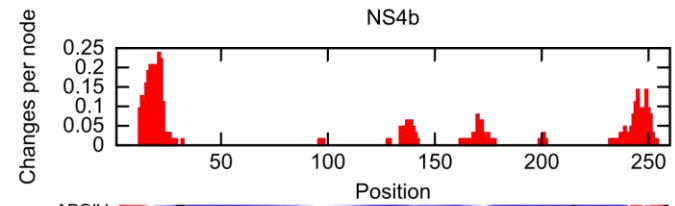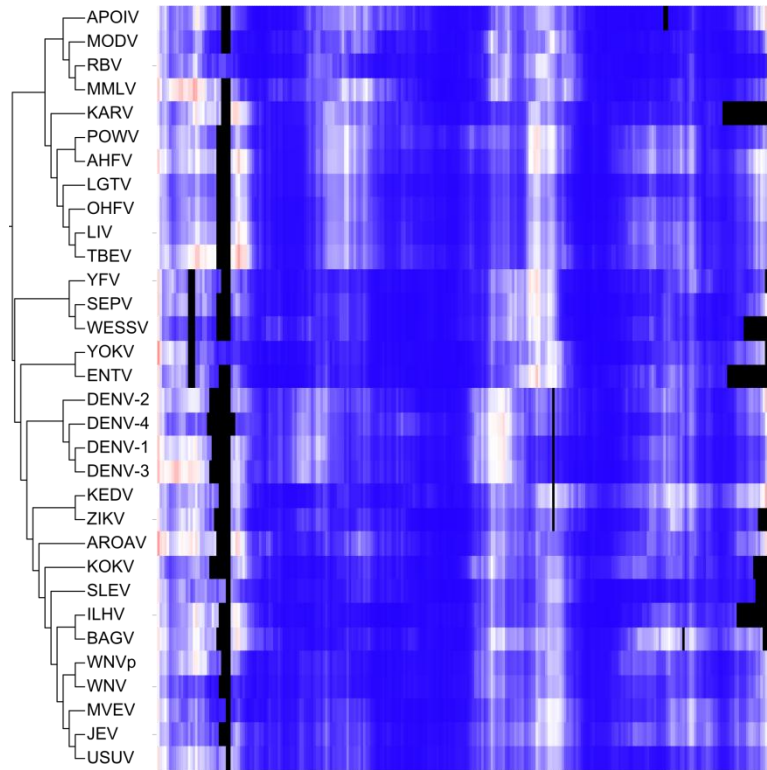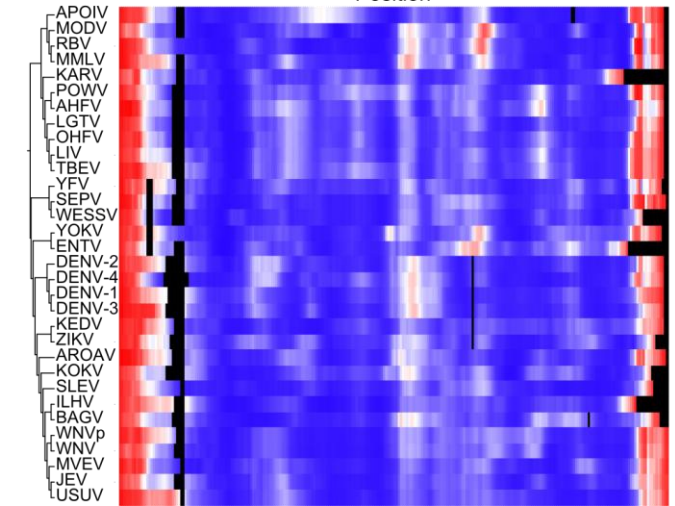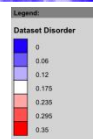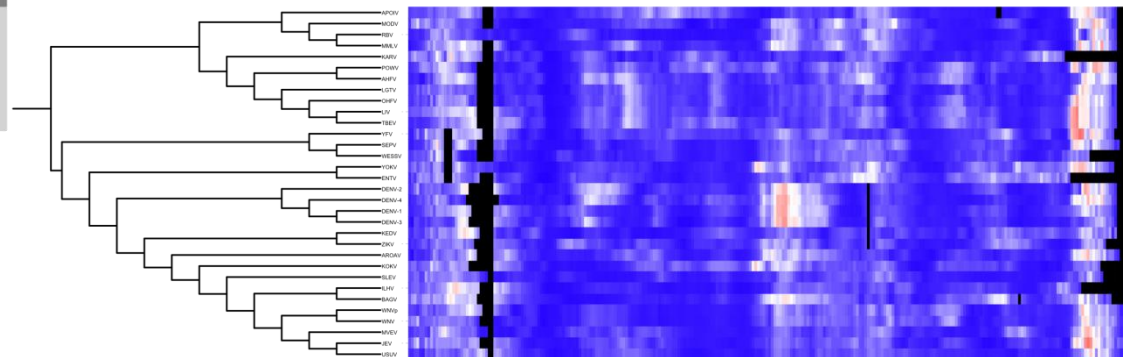



Figure 3J.

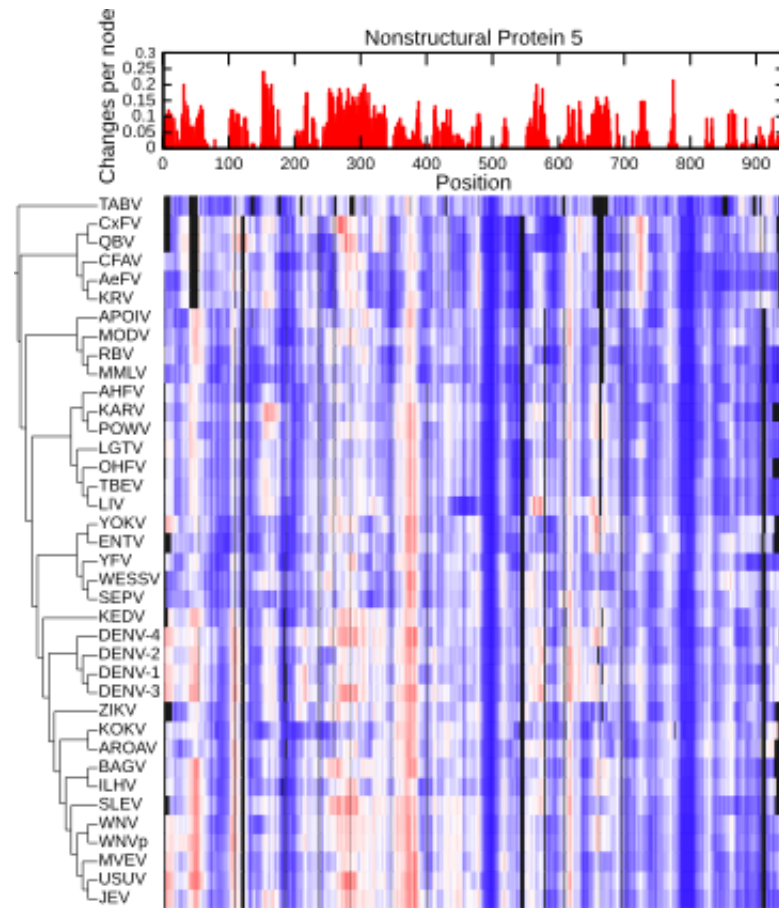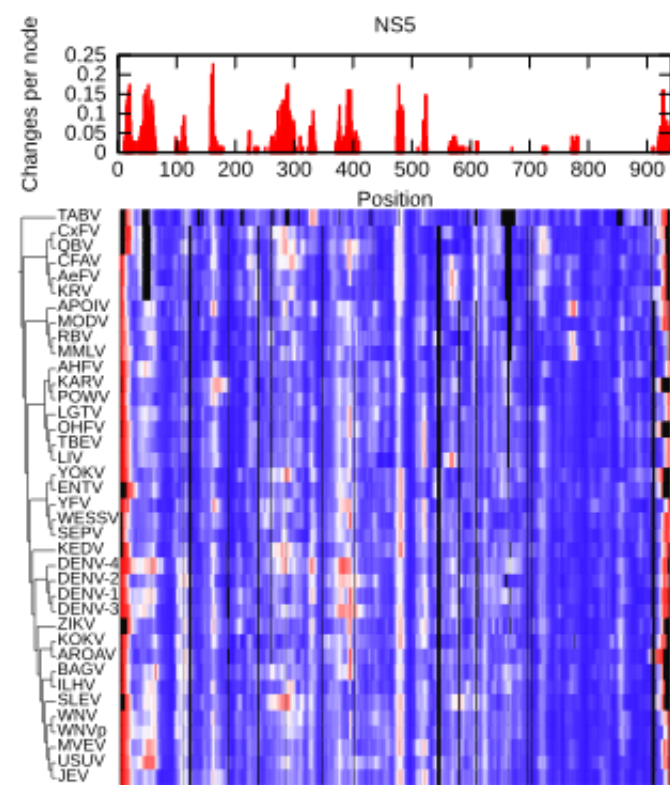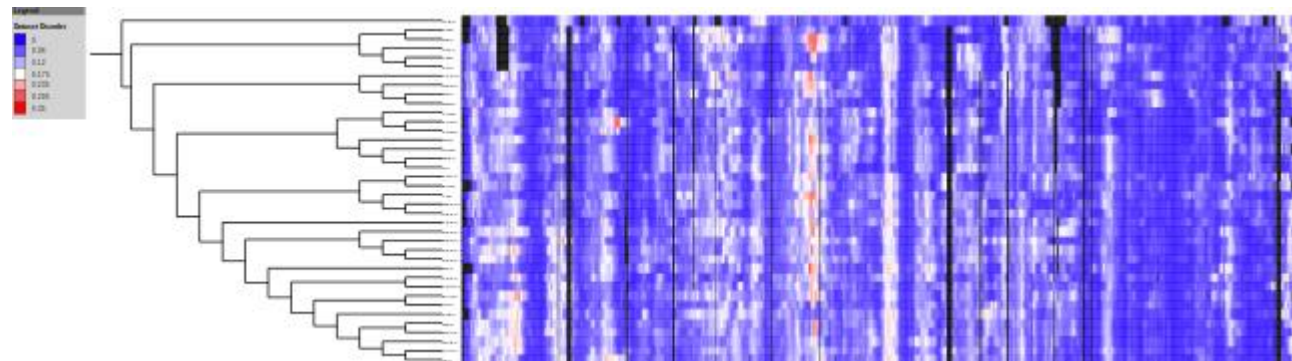

# Figure 4.

The correlation between PONDR-FIT and IUPred scores for the entire dataset (All sites), sites excluding first and last 50 sites in each alignment (center sites), and only the first and last 50 sites in each alignment (end sites). Linear regression was drawn for each case.

Figure 4.

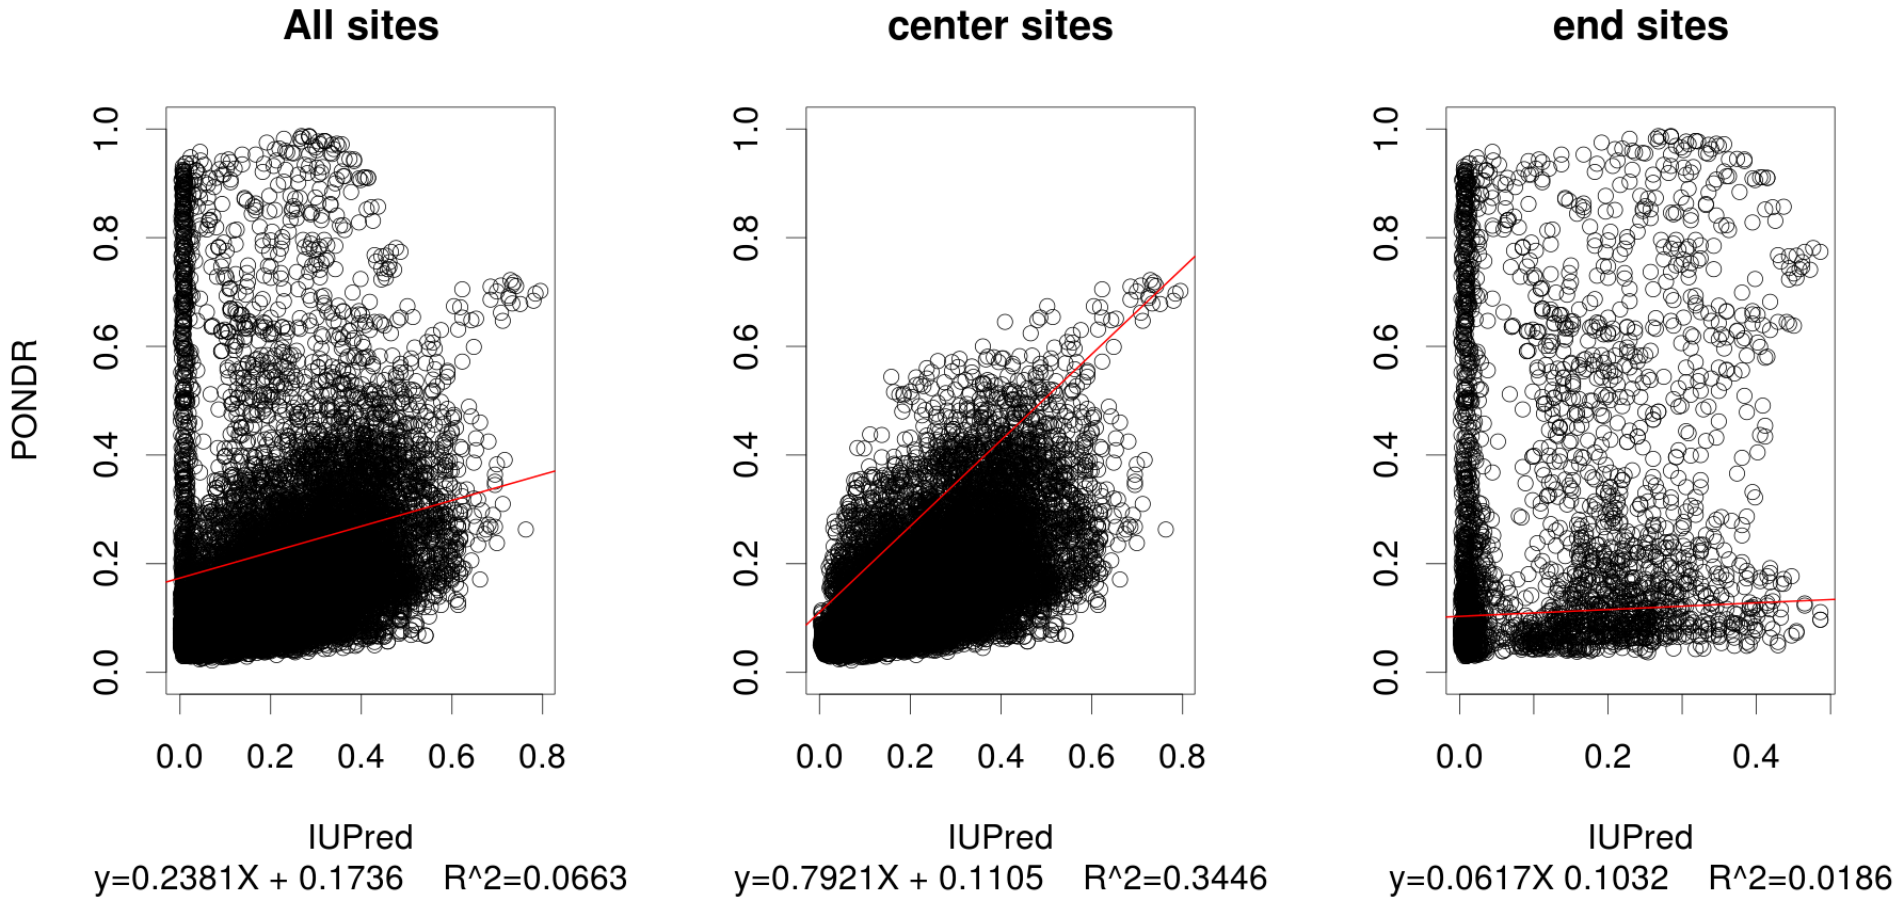

# Figure 5.

A comparison of the structurally differing regions between experimental x-ray crystallography structures of the Envelope protein in DENV-1 and TBEV.

-  RMSD difference
-  High B-factor in DENV1
-  RMSD difference plus high B-factor



Figure 5.

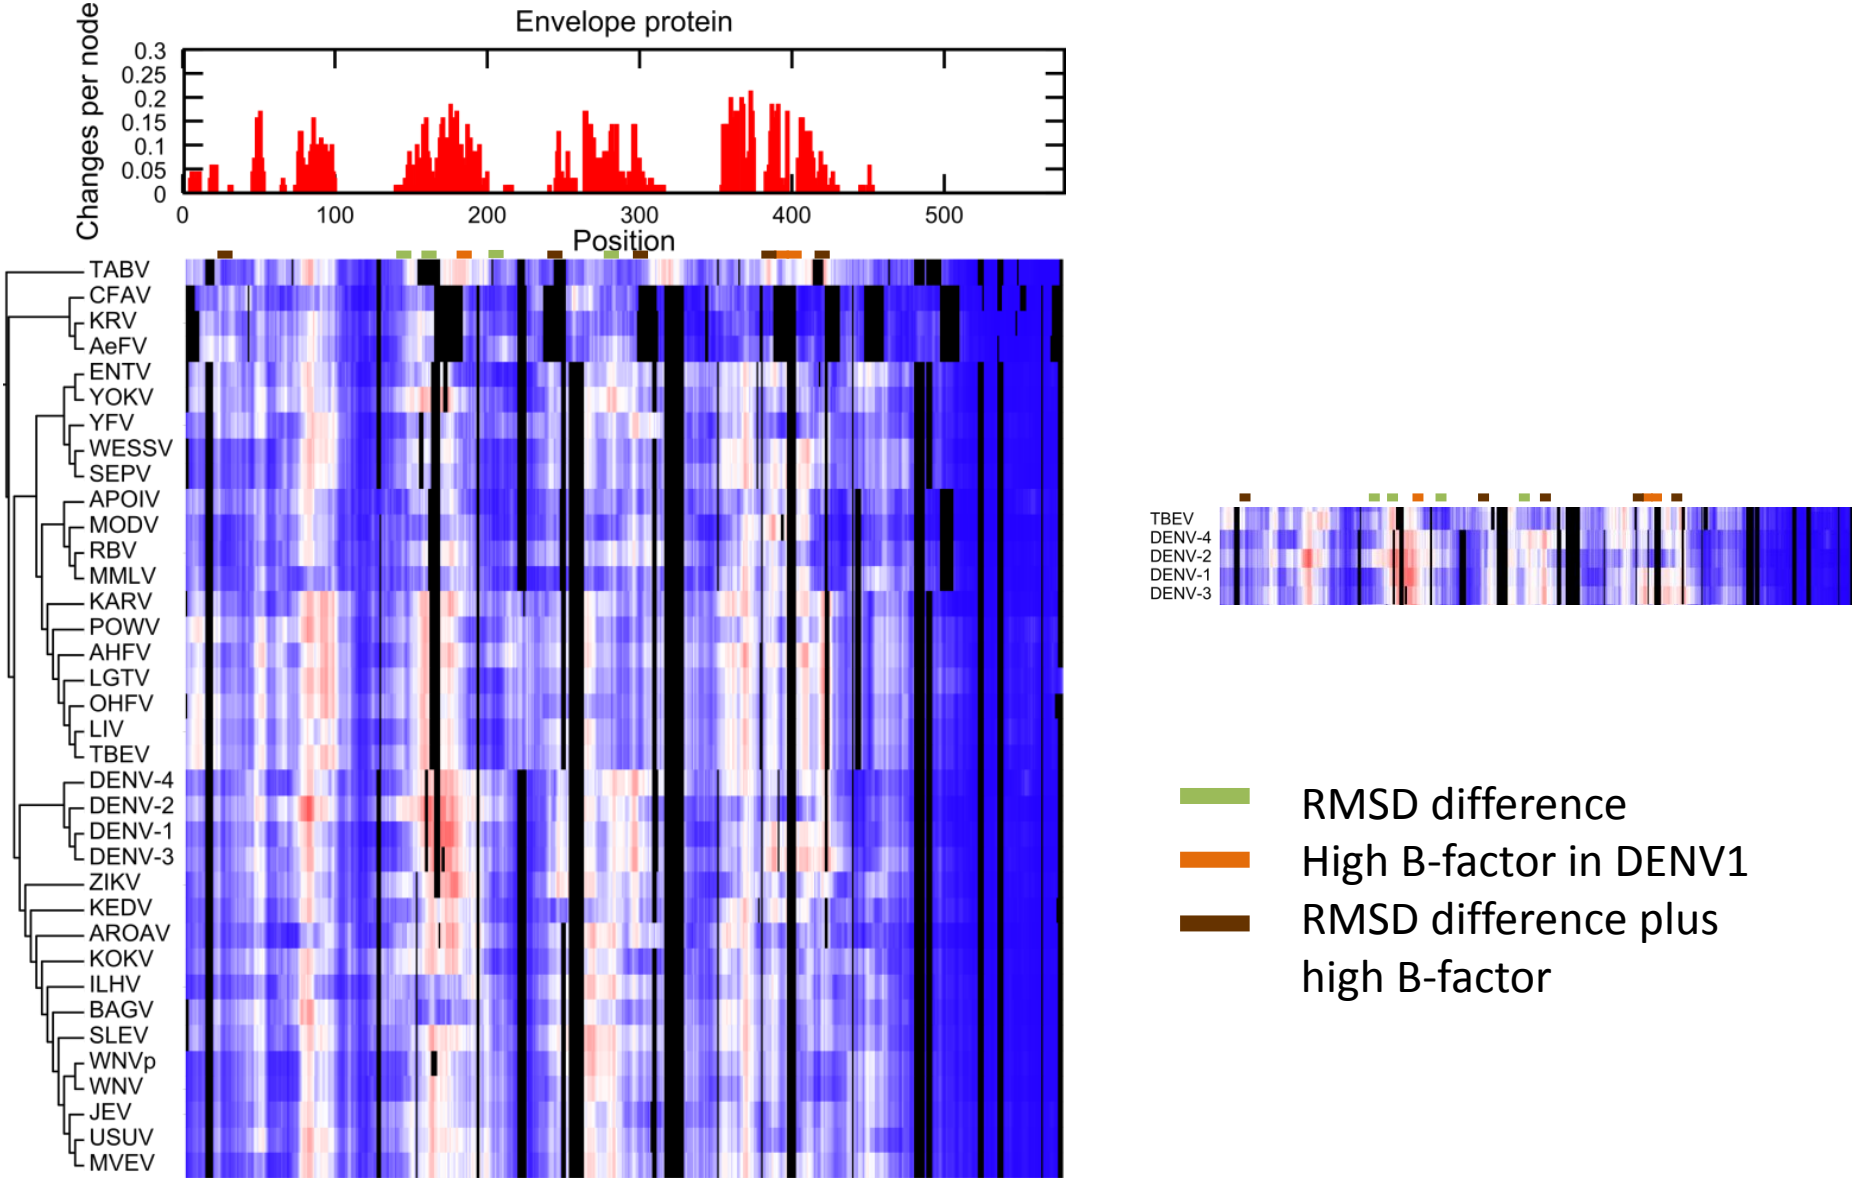

Supplement: supp_evt026_supplementary_materials.pdf [file supp_evt026_supplementary_materials.pdf]
